# Supplementary material for: Comparison of thrombus, gut, and oral microbiomes in Korean patients with ST-elevation myocardial infarction: a case–control study
Source: PubMed Central journal article supplement (PMC8080616; doi:10.1038/s12276-020-00543-1), 2020-12-18
Supplement: 12276_2020_543_MOESM1_ESM.pdf [file 12276_2020_543_MOESM1_ESM.pdf]

**Supplementary Figure 1.** Acquisition of coronary thrombus. (a) Thrombus aspiration using a manual suction device during primary coronary intervention. (b) Acquired thrombus using a dedicated filter. (c) Samples were moved and stored in an Eppendorf tube filled with 0.9% normal saline.

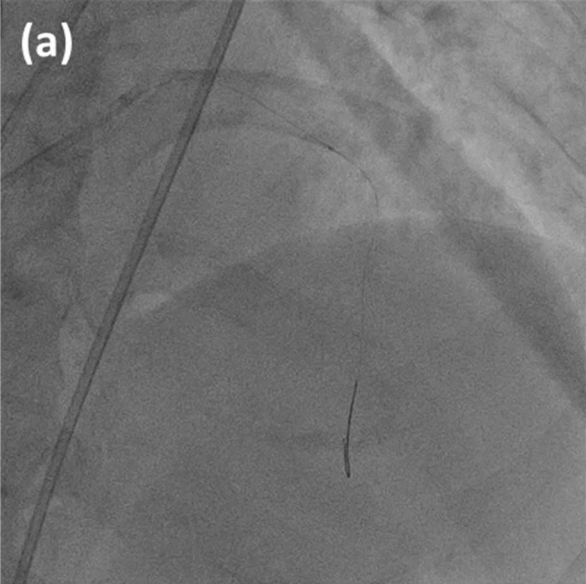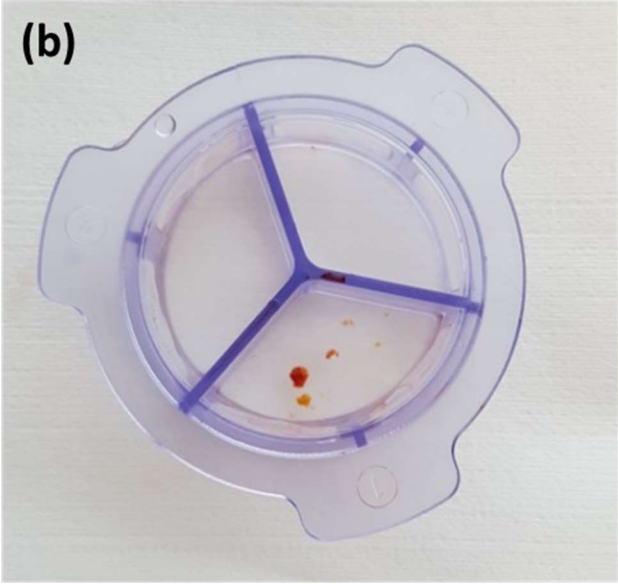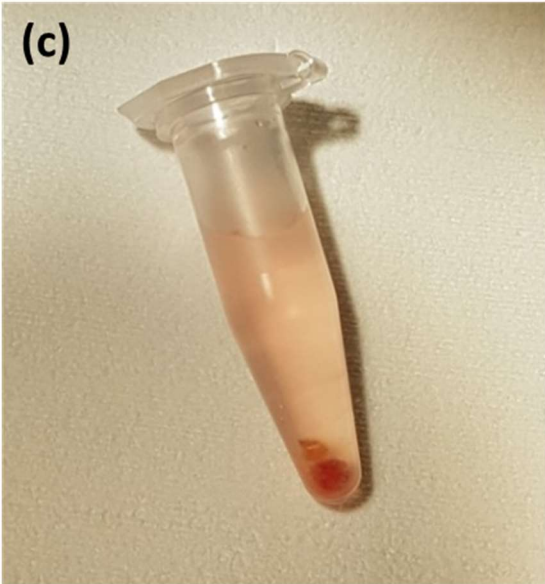

**Supplementary Figure 2.** Krona chart of the bacteria represented by 16S rRNA sequences recovered (a) the gut microbiome and (b) the oral microbiome.

**(a) Gut**

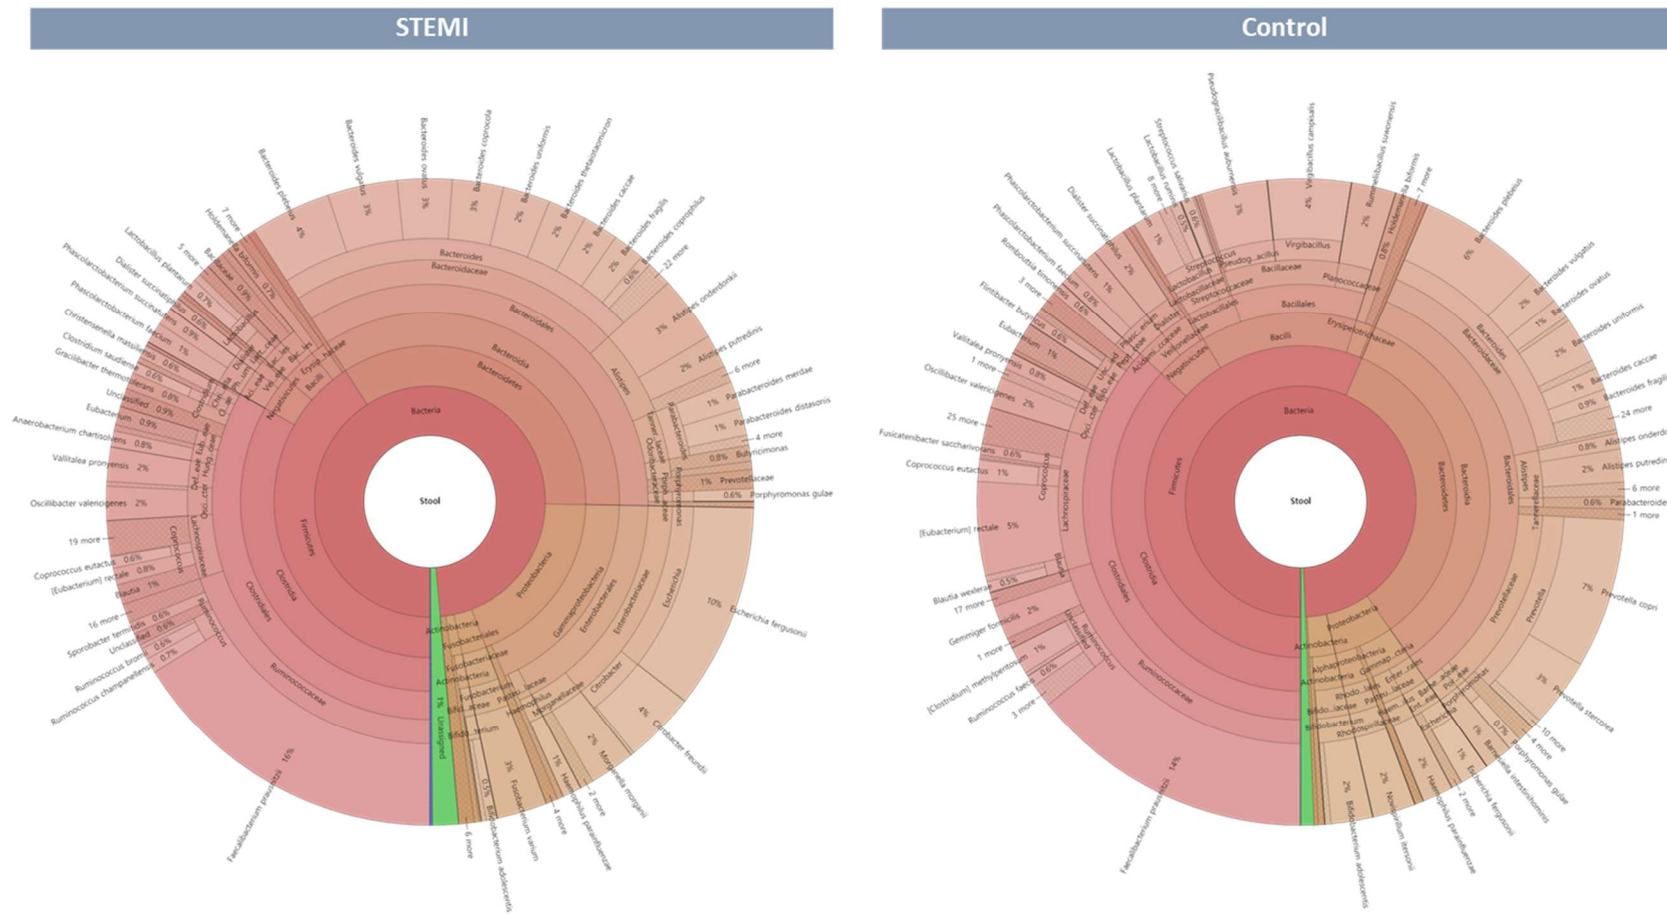

## (b) Oral cavity

### STEMI

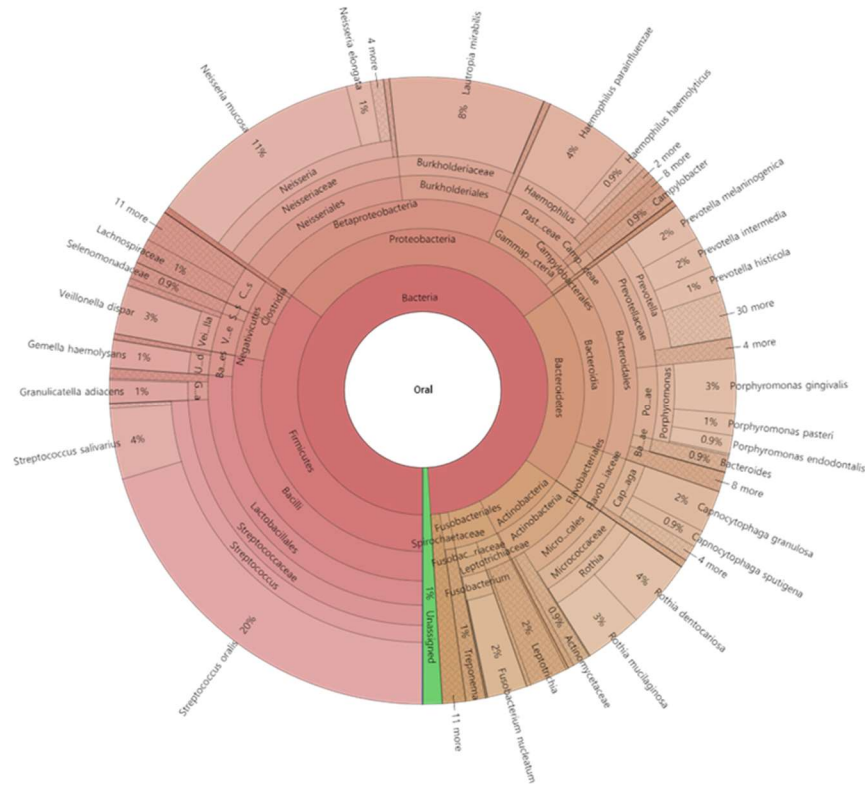

### Control

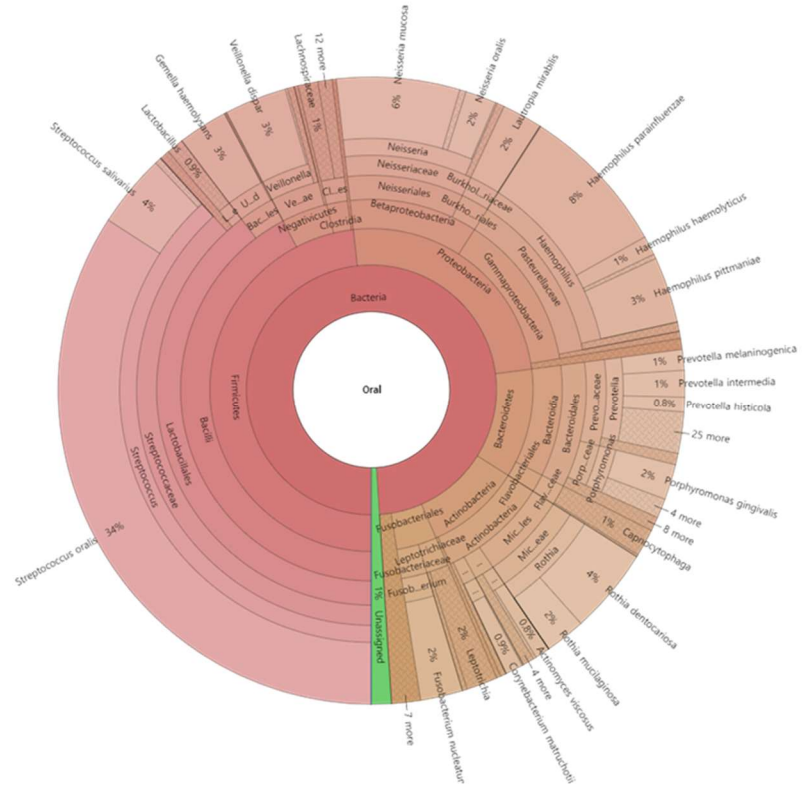

**Supplementary Figure 3.** Alpha-diversity of (a) the gut microbiome and (b) the oral microbiome did not differ significantly between the groups (Stool sample:  $P=0.820$  by the Shannon index,  $P=0.799$  by the inverse Simpson index; oral sample:  $P=0.075$  by the Shannon index,  $P=0.299$  by the inverse Simpson index).

### (a) Gut

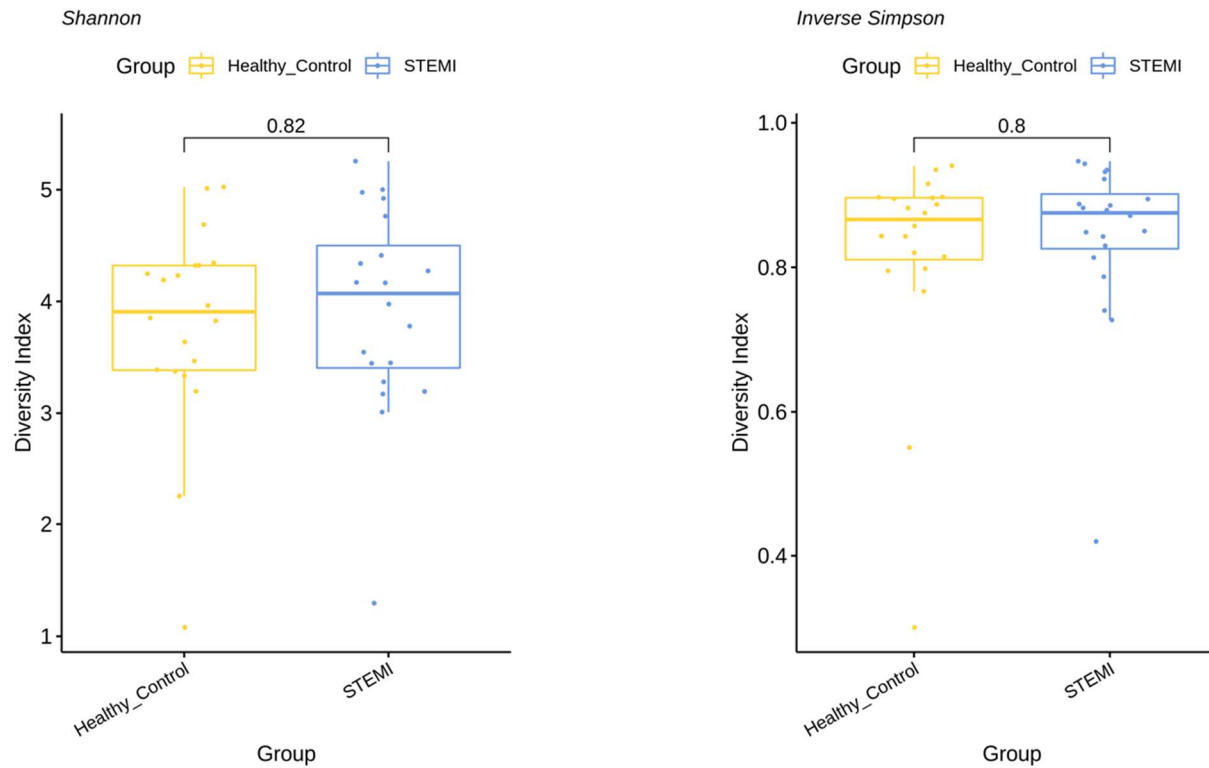

## (b) Oral

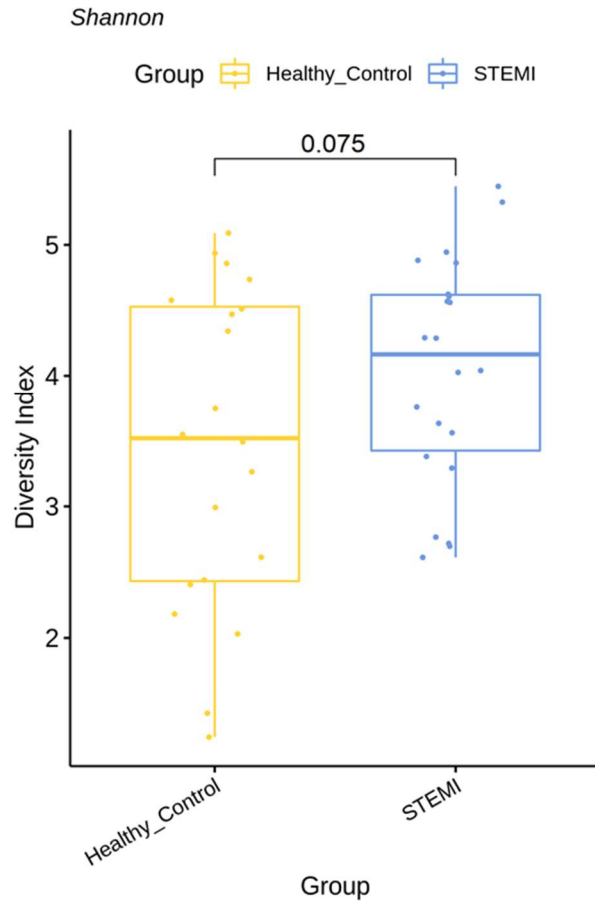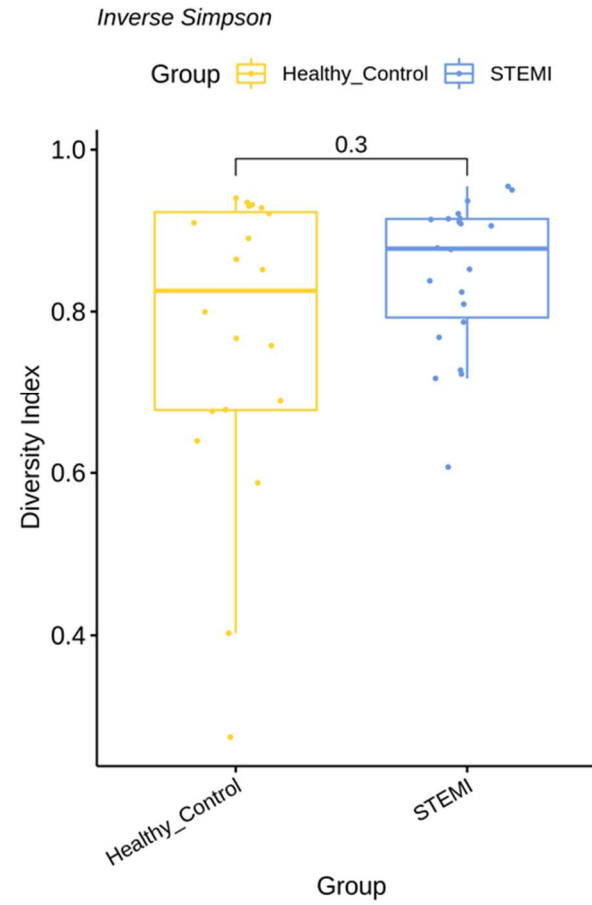

**Supplementary Figure 4.** Bar plot showing relative abundance at each taxonomic level ((a) Phylum, (b) Class, (c) Order, (d) Family, (e) Species except for the genus level which is presented in Figure 2) in the stool, oral, and thrombus microbiome of the patient and control groups.

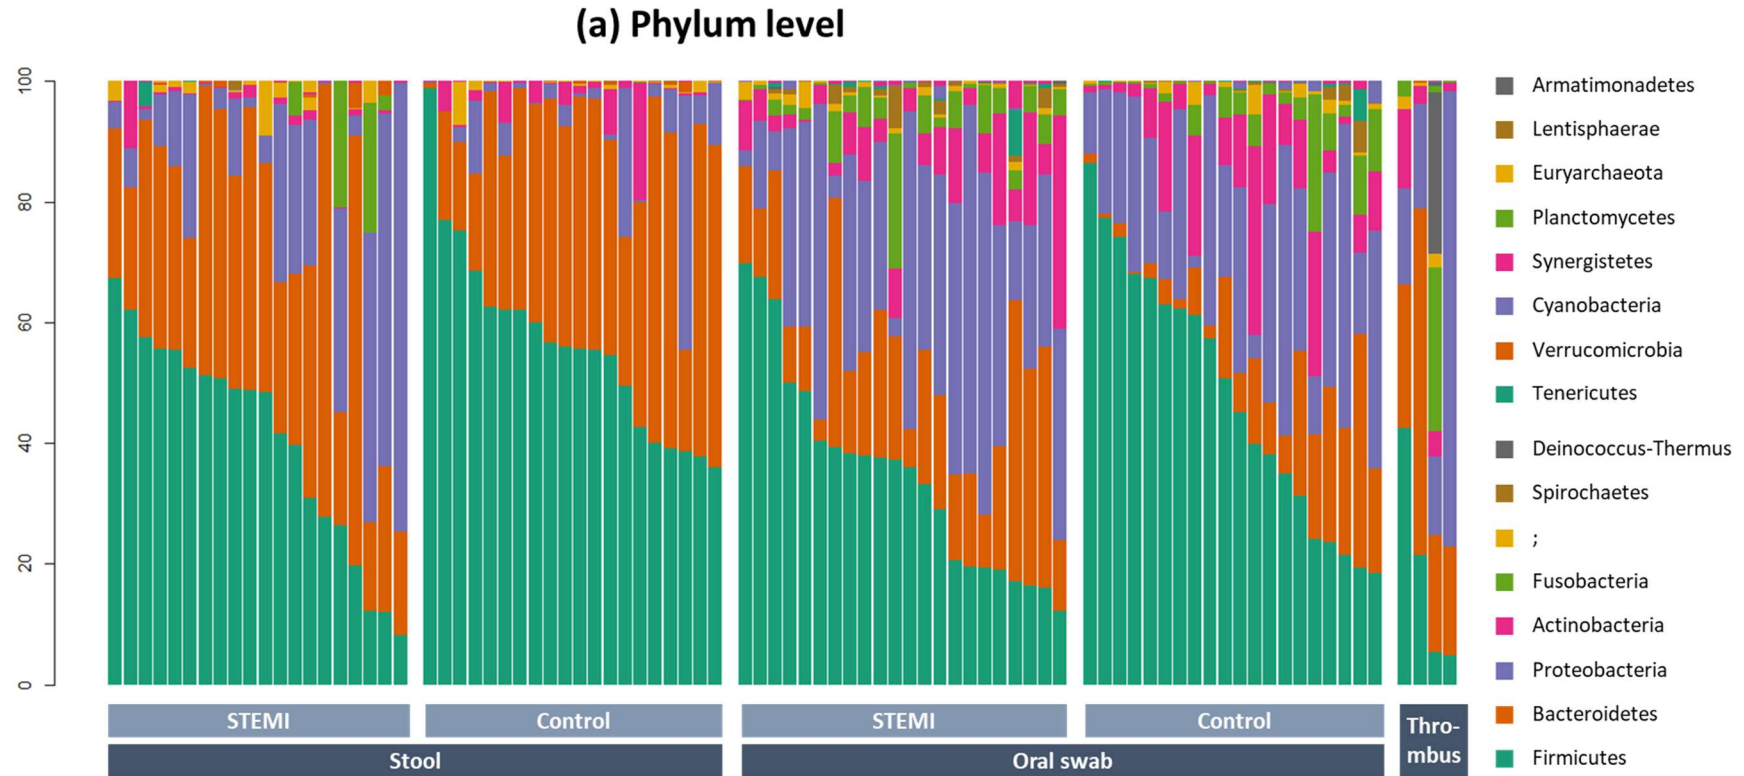

(b) Class level

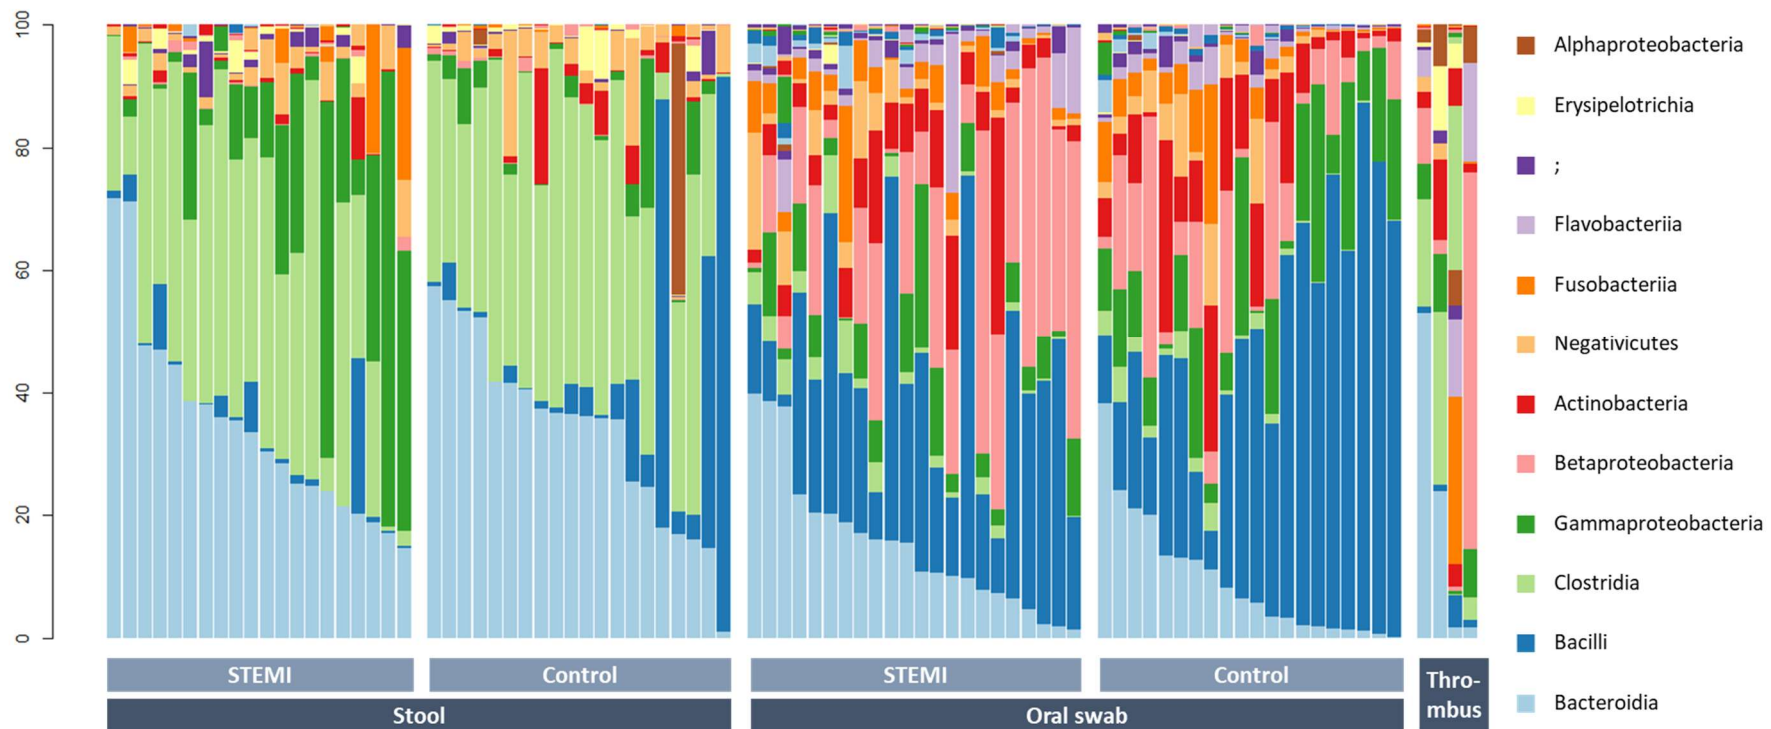



(c) Order level

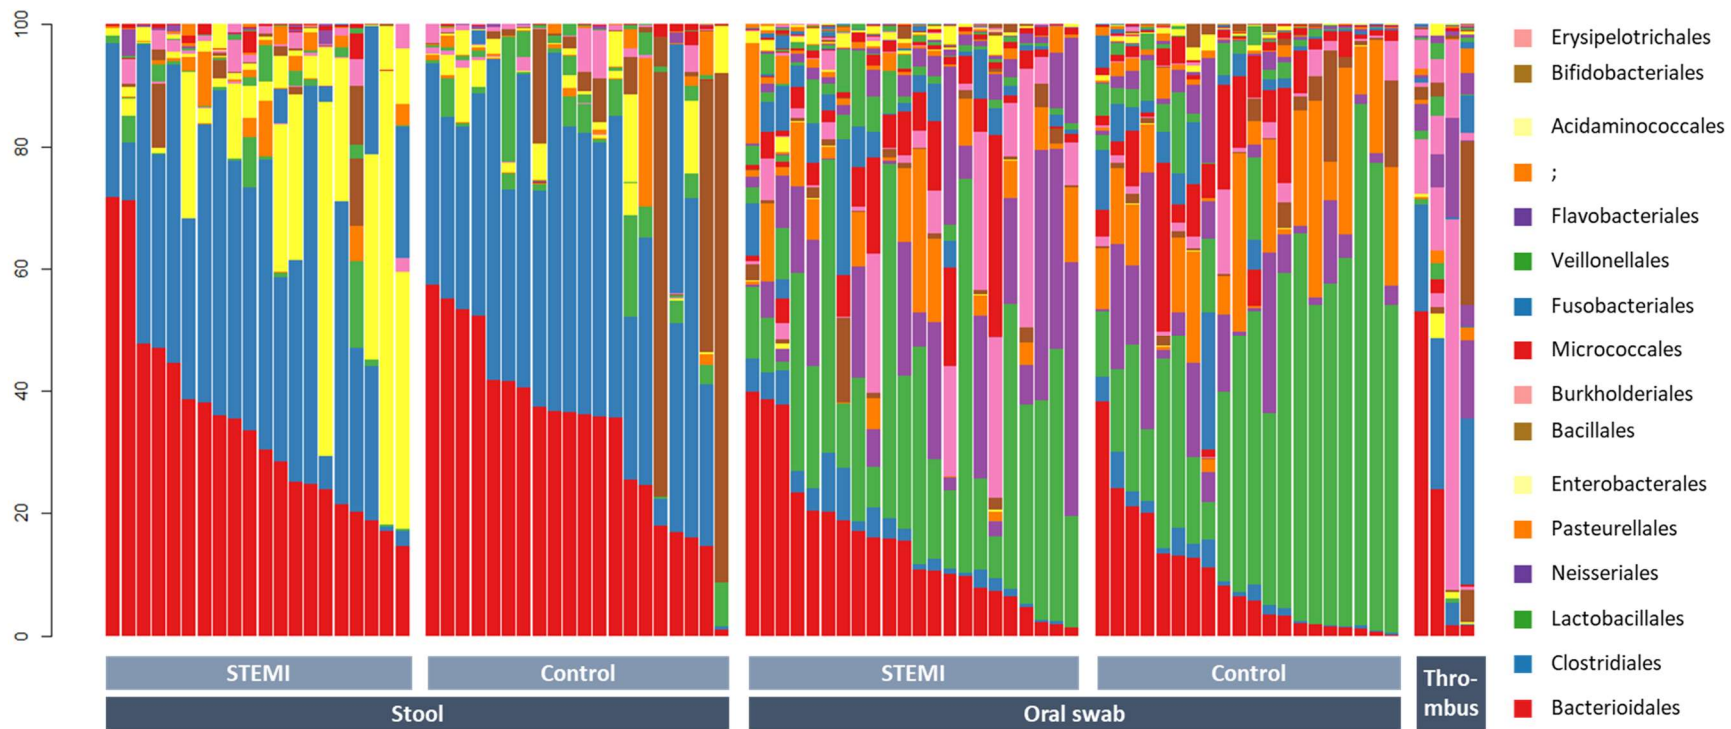



(d) Family level

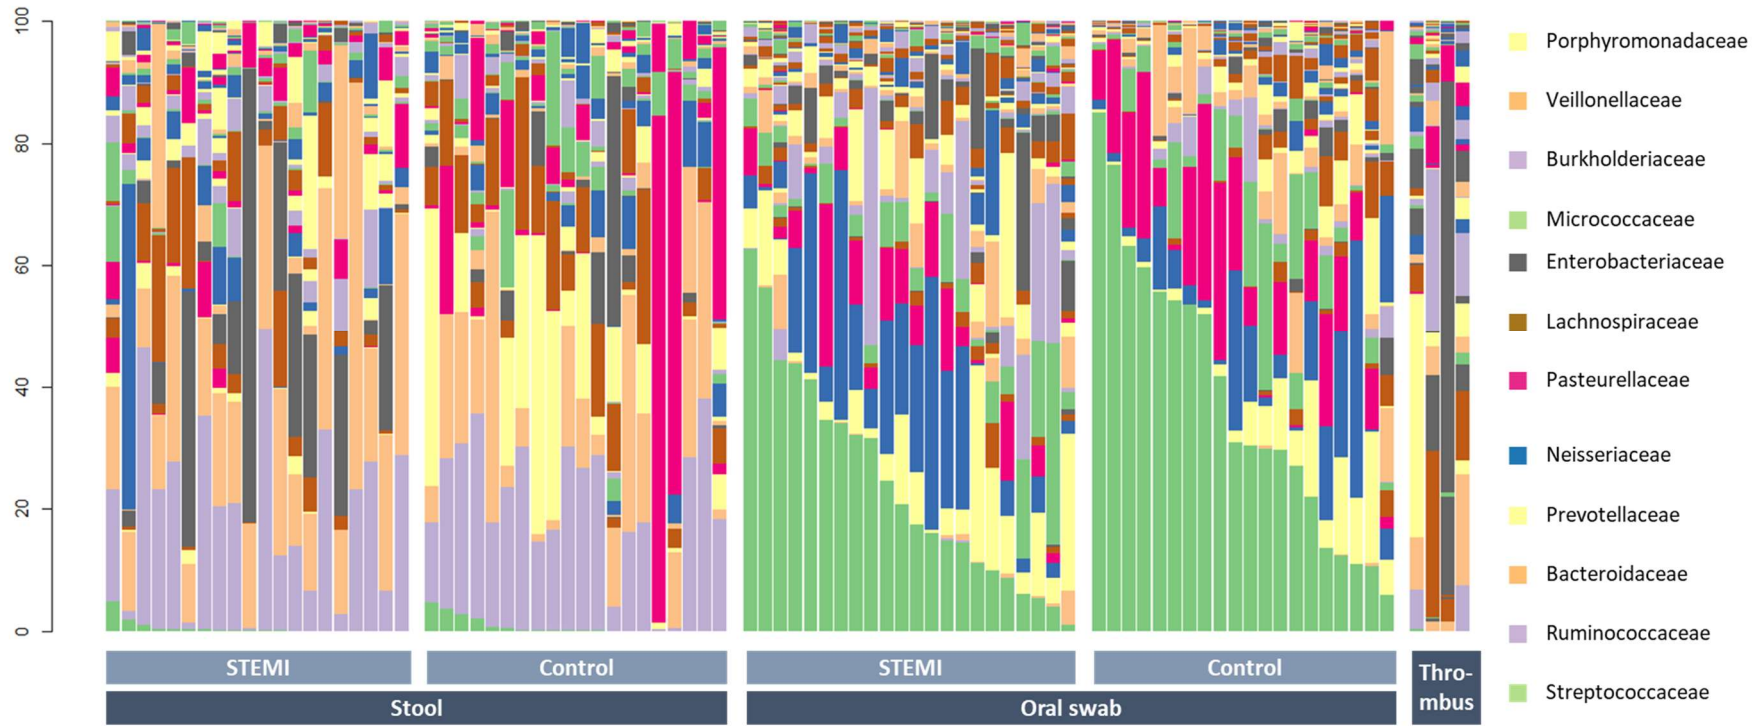

(e) Genus level

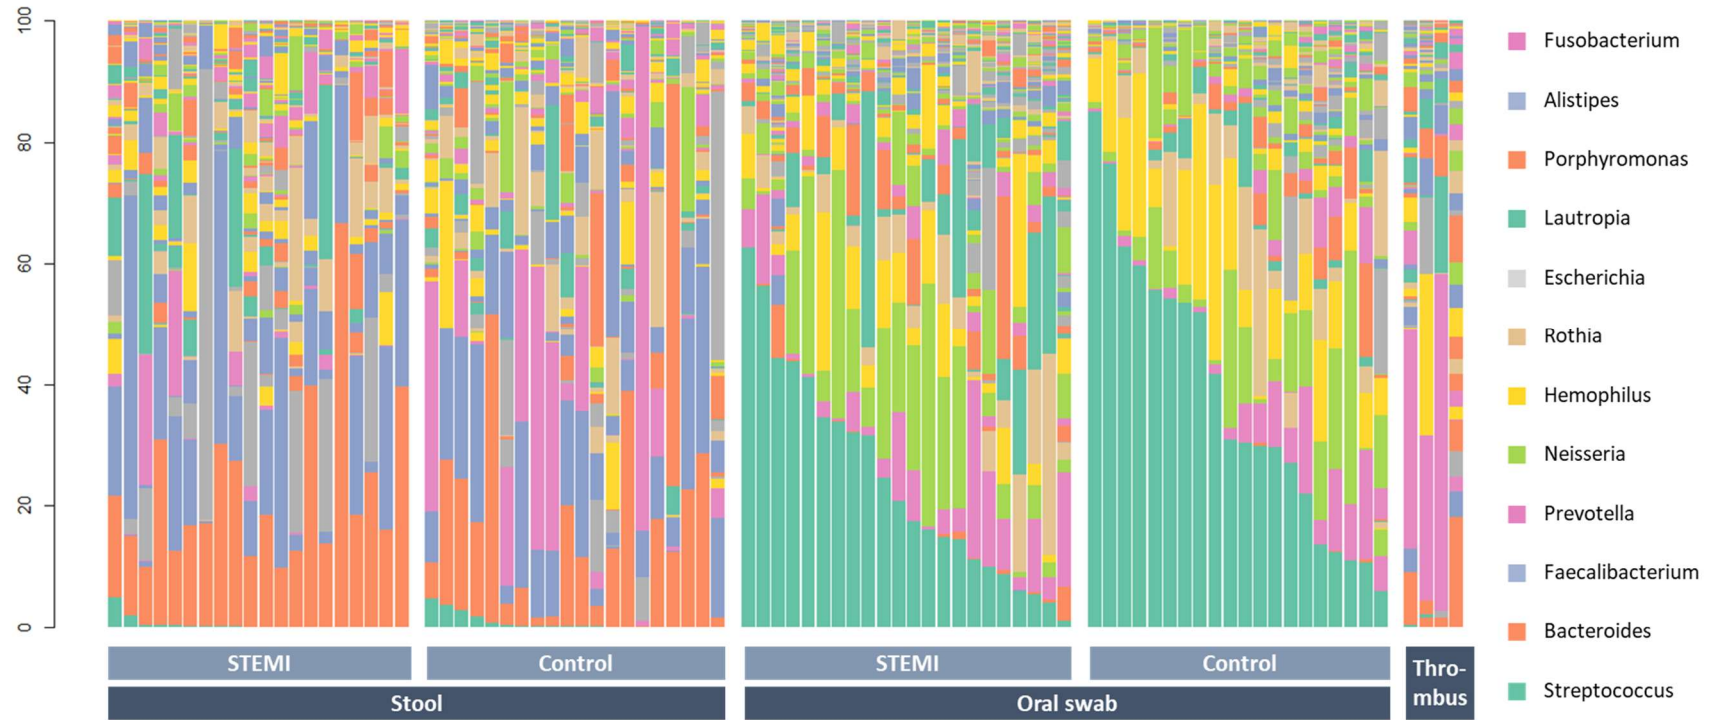







### (d) Family level

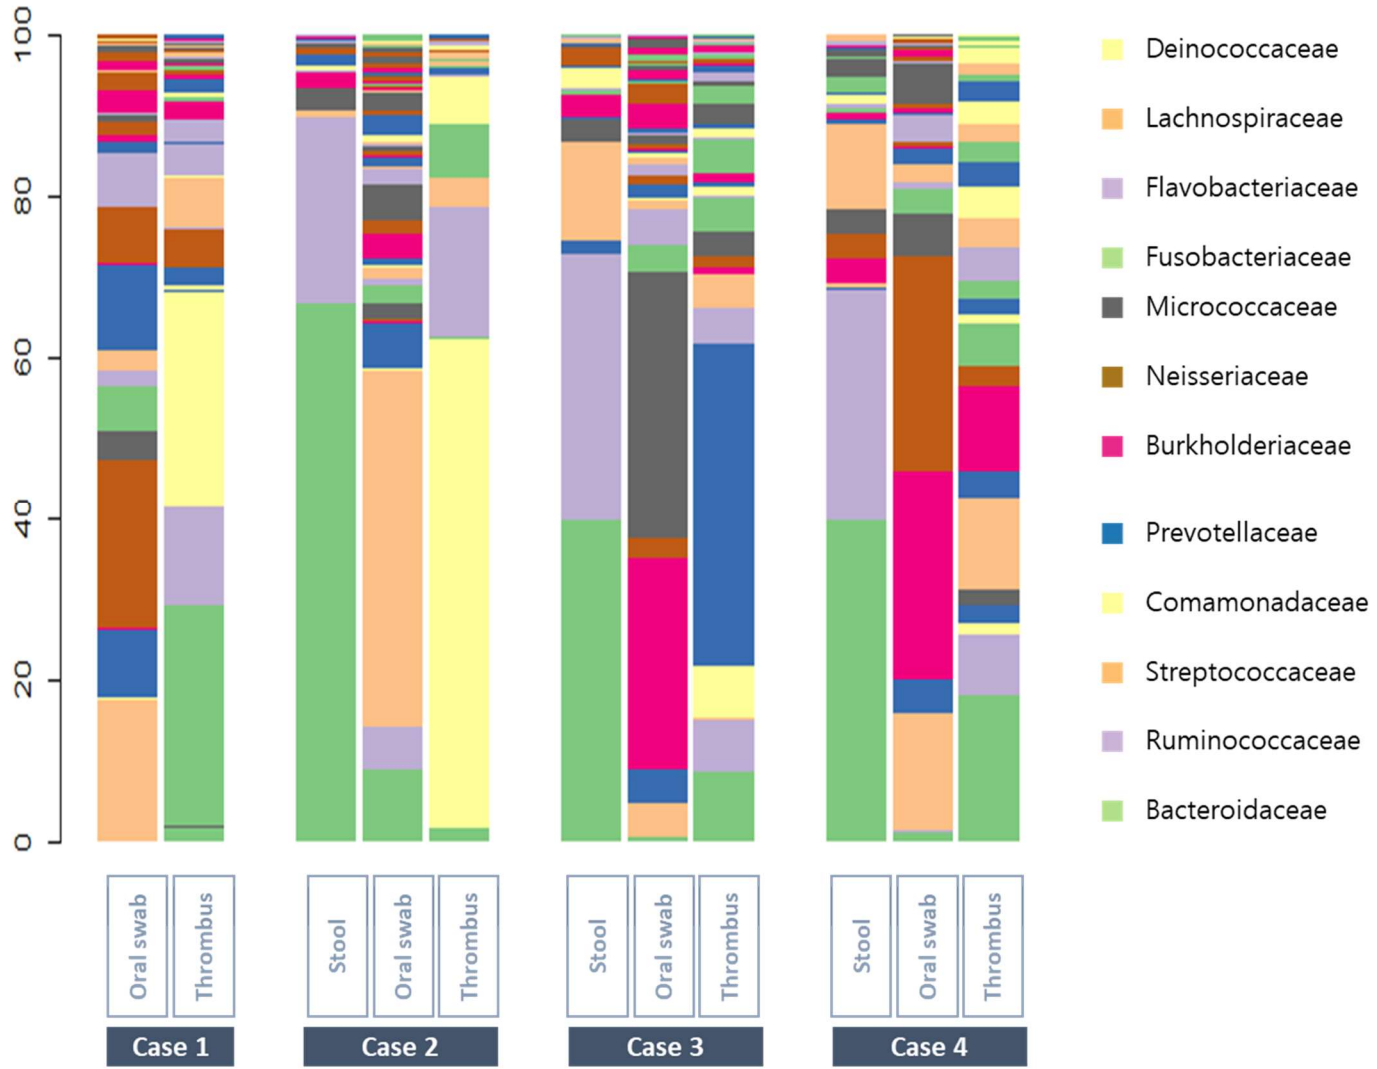





### (f) Species level

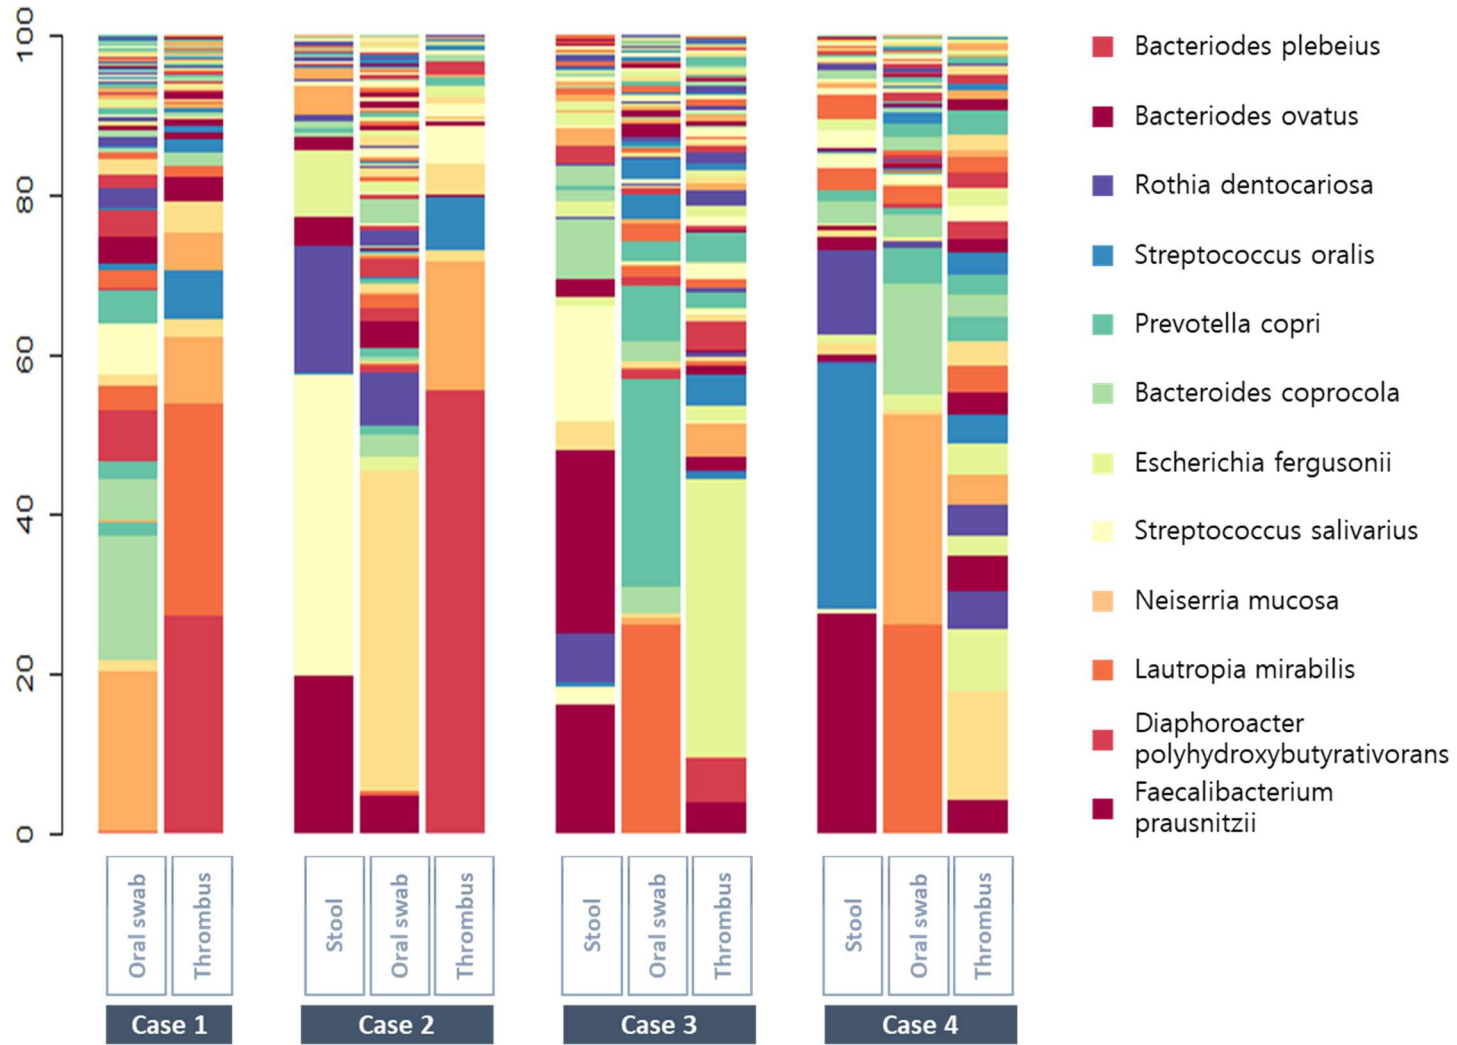

**Supplementary Figure 6.** Beta-diversity of (a) the gut microbiome and (b) the oral microbiome using principal coordinate analysis (PCoA). OTUs of both stool and oral microbiomes showed different clustering between groups suggesting phylogenetic closeness of the microbial communities within each group.

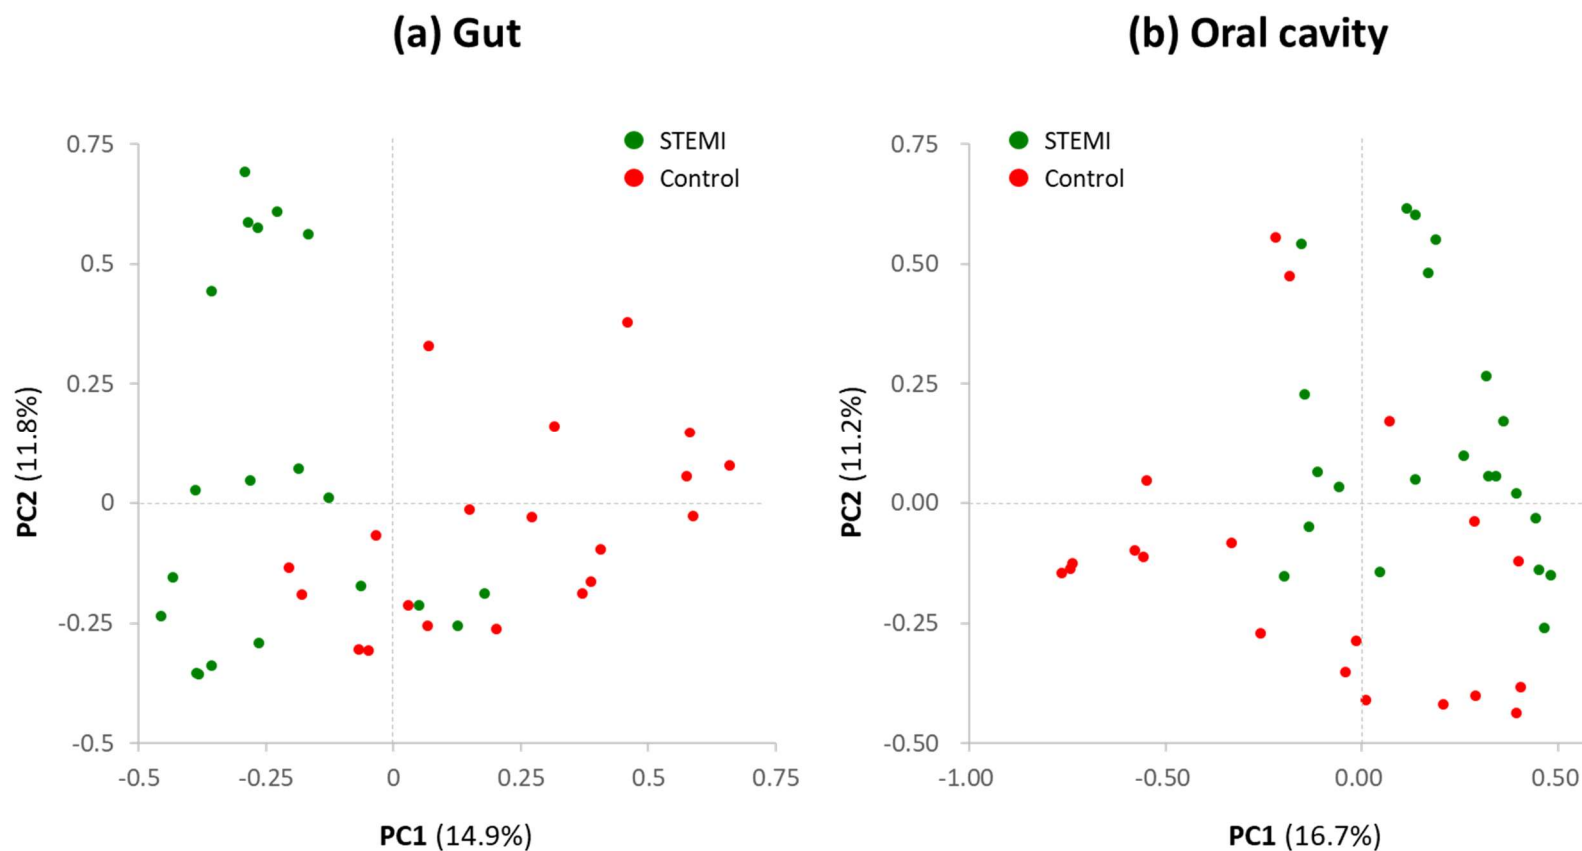

**Supplementary Figure 7.** Beta-diversity of (a) the gut microbiome and (b) the oral microbiome matching with individual patients with thrombi sample, using principal coordinate analysis (PCoA).

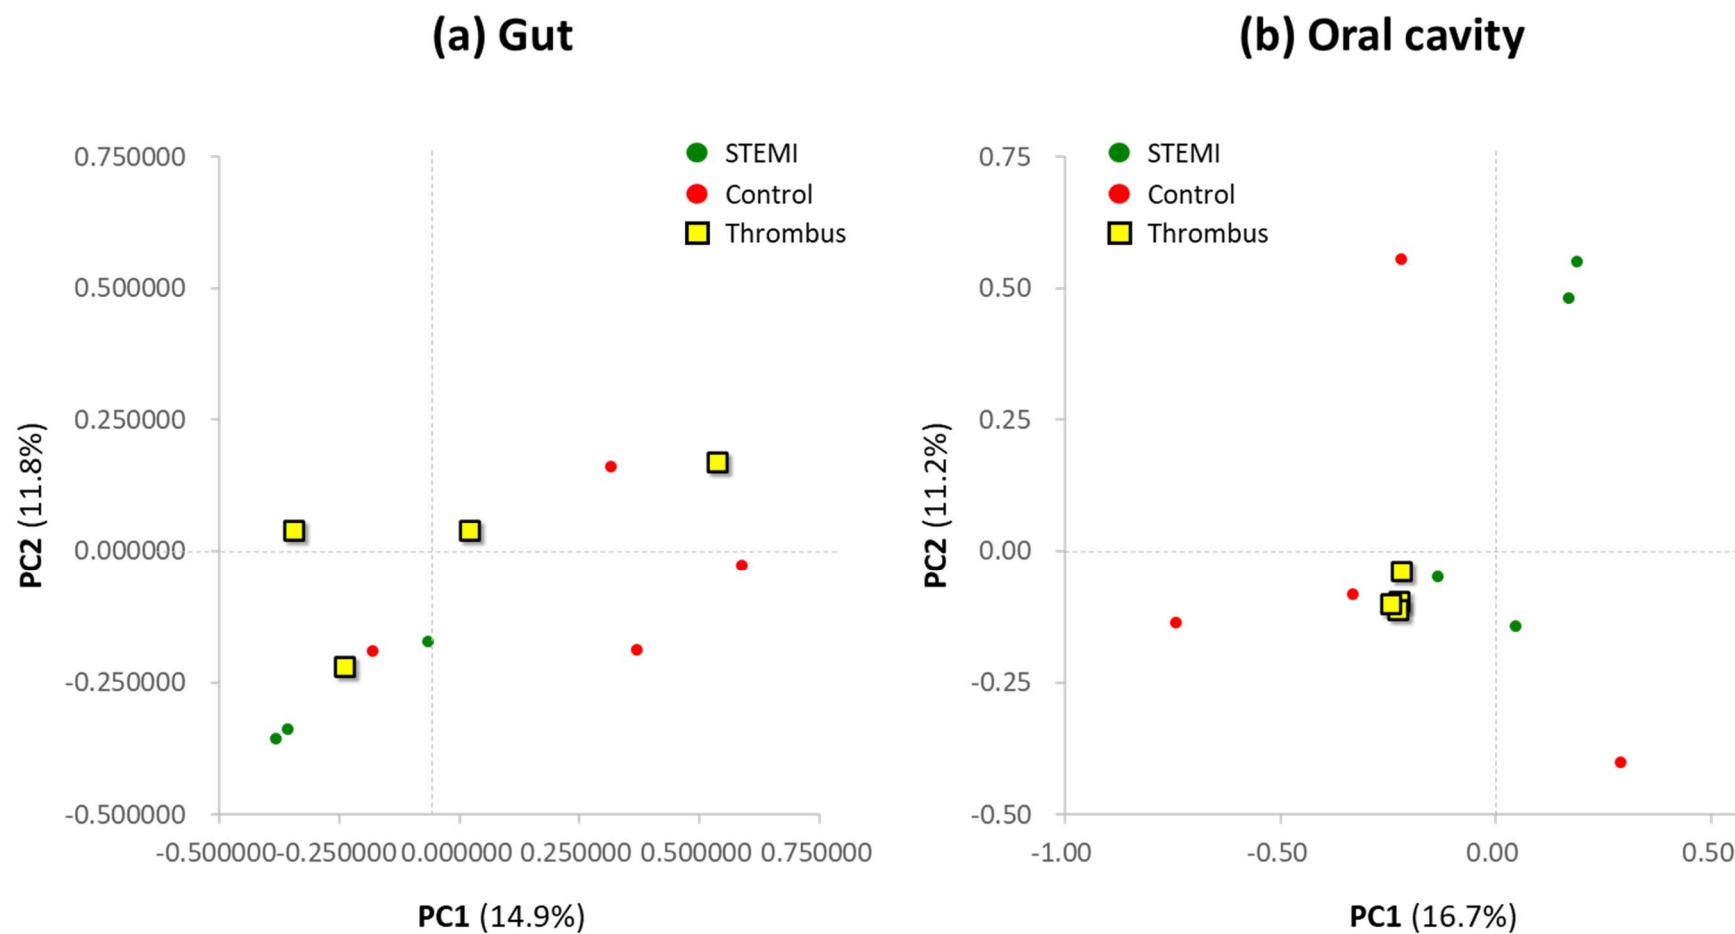

**Supplementary Figure 8.** Heatmap of the thrombi, oral, and gut microbiota of individual patients at the species level. Relative abundance ratios of selected biomarkers are depicted for (a) stool and thrombus, and (b) oral swab and thrombus. The blue color represents lower abundance, white color represents intermediate abundance and red represents the highest abundance.

**(a) Thrombus and gut microbiome**

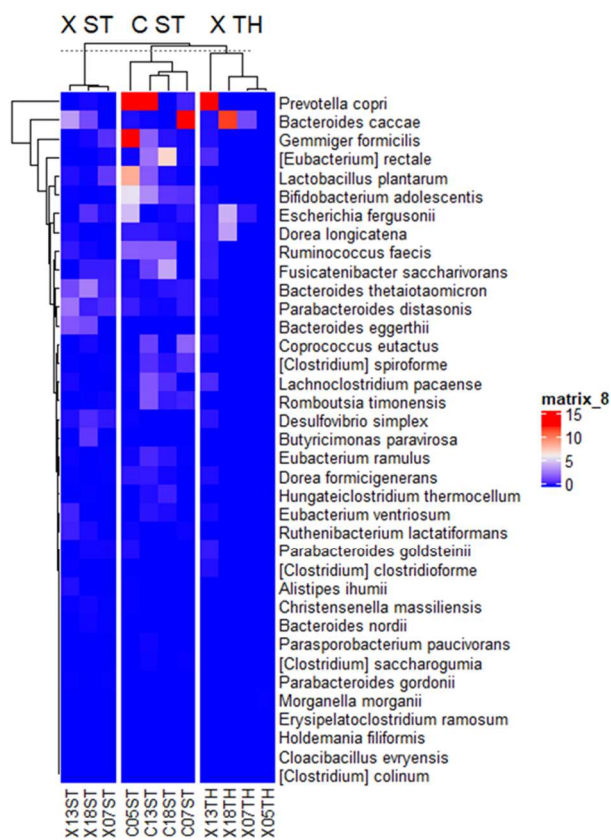

**(b) Thrombus and oral microbiome**

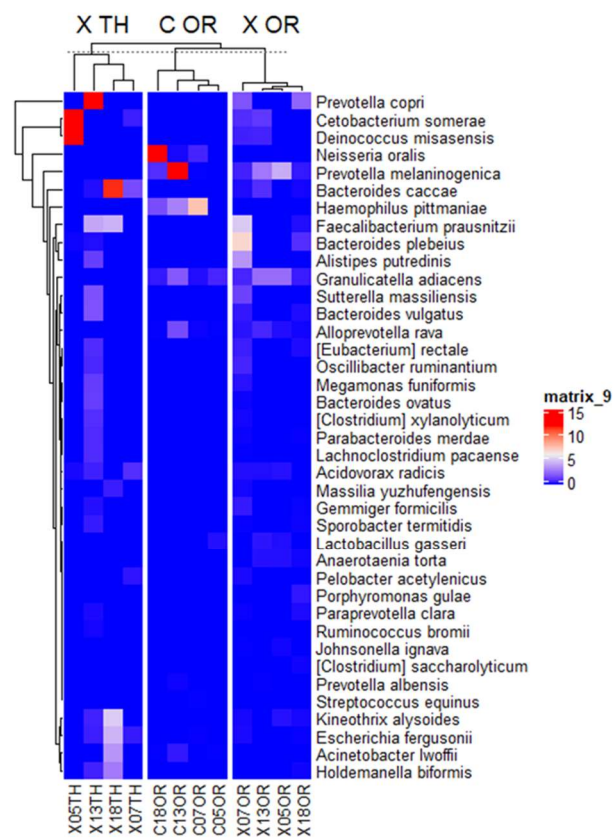

**Supplementary Figure 9.** Analysis of similarities (ANOSIM) was performed to compare the matrix of rank dissimilarity. The dissimilarity between the stool and thrombus samples was larger than that between the oral and thrombus samples (unweighted  $R=0.444$  and  $0.2916$ , respectively)

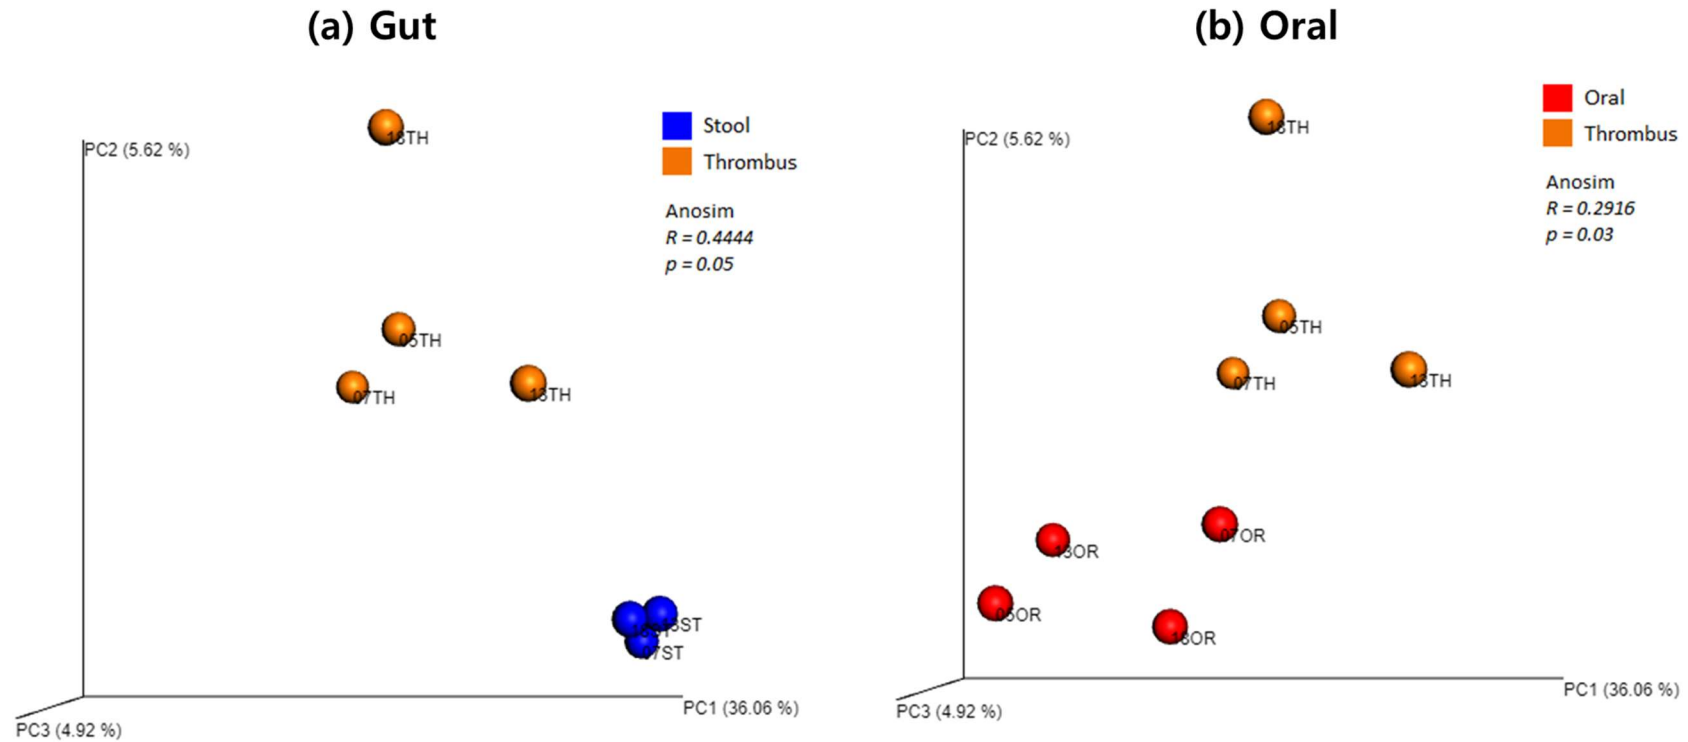

**Supplementary Table 1. Full taxonomic comparative analysis of gut microbiome**

| Kingdom    | Phylum         | Class               | Order              | Family                 | Genus                 | STEMI    | Control  | Unadjusted P-value | FDR-adjusted P-value |
|------------|----------------|---------------------|--------------------|------------------------|-----------------------|----------|----------|--------------------|----------------------|
| Bacteria   | Proteobacteria | Gammaproteobacteria | Enterobacterales   | Enterobacteriaceae     | Escherichia           | 10.2651% | 1.4595%  | 0.0031             | 0.0292               |
| Bacteria   | Firmicutes     | Clostridia          | Clostridiales      | Lachnospiraceae        |                       | 0.8425%  | 4.6645%  | 0.0035             | 0.0292               |
| Bacteria   | Bacteroidetes  | Bacteroidia         | Bacteroidales      | Tannerellaceae         | Parabacteroides       | 3.2300%  | 0.6229%  | 0.0035             | 0.0292               |
| Bacteria   | Firmicutes     | Clostridia          | Clostridiales      | Christensenellaceae    | Christensenella       | 0.6708%  | 0.1739%  | 0.0047             | 0.0292               |
| Bacteria   | Firmicutes     | Bacilli             | Lactobacillales    | Lactobacillaceae       | Lactobacillus         | 1.1234%  | 2.5415%  | 0.0067             | 0.0336               |
| Bacteria   | Actinobacteria | Actinobacteria      | Bifidobacteriales  | Bifidobacteriaceae     | Bifidobacterium       | 0.7869%  | 2.3786%  | 0.0239             | 0.0995               |
| Bacteria   | Proteobacteria | Gammaproteobacteria | Enterobacterales   | Morganellaceae         | Morganella            | 2.2715%  | 0.0000%  | 0.0402             | 0.1434               |
| Bacteria   | Proteobacteria | Gammaproteobacteria | Enterobacterales   | Enterobacteriaceae     | Citrobacter           | 3.7437%  | 0.5263%  | 0.0564             | 0.1764               |
| Bacteria   | Bacteroidetes  | Bacteroidia         | Bacteroidales      | Bacteroidaceae         | Bacteroides           | 22.2797% | 15.0051% | 0.0675             | 0.1875               |
| Bacteria   | Fusobacteria   | Fusobacteriia       | Fusobacteriales    | Fusobacteriaceae       | Fusobacterium         | 2.5214%  | 0.0139%  | 0.0922             | 0.2304               |
| Bacteria   | Firmicutes     | Clostridia          | Clostridiales      | Ruminococcaceae        | Ruminococcus          | 1.5151%  | 1.7450%  | 0.1167             | 0.2454               |
| Bacteria   | Proteobacteria | Gammaproteobacteria | Pasteurellales     | Pasteurellaceae        | Haemophilus           | 0.9546%  | 1.5414%  | 0.1178             | 0.2454               |
| Bacteria   | Bacteroidetes  | Bacteroidia         | Bacteroidales      | Odoribacteraceae       | Butyricimonas         | 0.8048%  | 0.3148%  | 0.1539             | 0.2960               |
| Bacteria   | Firmicutes     | Clostridia          | Clostridiales      | Lachnospiraceae        | Blautia               | 0.9981%  | 0.8715%  | 0.2110             | 0.3620               |
| Bacteria   | Firmicutes     | Negativicutes       | Acidaminococcales  | Acidaminococcaceae     | Phascolarctobacterium | 2.0049%  | 2.1998%  | 0.2172             | 0.3620               |
| Unassigned | Unassigned     | Unassigned          | Unassigned         | Unassigned             | Unassigned            | 1.2989%  | 0.6593%  | 0.3301             | 0.5012               |
| Bacteria   | Firmicutes     | Clostridia          | Clostridiales      | Eubacteriaceae         | Eubacterium           | 0.9254%  | 1.4442%  | 0.3408             | 0.5012               |
| Bacteria   | Firmicutes     | Clostridia          | Clostridiales      | Defluviitaleaceae      | Vallitalea            | 1.7058%  | 0.8457%  | 0.3752             | 0.5212               |
| Bacteria   | Firmicutes     | Clostridia          | Clostridiales      | Oscillospiraceae       | Oscillibacter         | 1.9302%  | 2.0299%  | 0.4093             | 0.5329               |
| Bacteria   | Firmicutes     | Clostridia          | Clostridiales      | Gracilbacteraceae      | Gracilibacter         | 0.8388%  | 0.3469%  | 0.4383             | 0.5329               |
| Bacteria   | Firmicutes     | Clostridia          | Clostridiales      | Hungateiclostridiaceae | Anaerobacterium       | 0.8107%  | 0.0715%  | 0.4555             | 0.5329               |
| Bacteria   | Firmicutes     | Erysipelotrichia    | Erysipelotrichales | Erysipelotrichaceae    | Holdemania            | 0.7048%  | 0.7657%  | 0.4698             | 0.5329               |
| Bacteria   | Bacteroidetes  | Bacteroidia         | Bacteroidales      | Rikenellaceae          | Alistipes             | 5.8356%  | 3.1278%  | 0.4903             | 0.5329               |
| Bacteria   | Firmicutes     | Clostridia          | Clostridiales      | Ruminococcaceae        | Faecalibacterium      | 16.1796% | 14.2183% | 0.3132             | 0.6364               |
| Bacteria   | Bacteroidetes  | Bacteroidia         | Bacteroidales      | Porphyromonadaceae     | Porphyromonas         | 0.6308%  | 0.6787%  | 0.8887             | 0.8887               |
| Bacteria   | Proteobacteria | Deltaproteobacteria | Desulfovibrionales | Desulfovibrionaceae    | Desulfovibrio         | 0.2923%  | 0.0838%  | 0.0012             | NA                   |
| Bacteria   | Bacteroidetes  | Bacteroidia         | Bacteroidales      | Prevotellaceae         | Prevotella            | 0.3867%  | 11.3933% | 0.0047             | NA                   |
| Bacteria   | Firmicutes     | Clostridia          | Clostridiales      | Lachnospiraceae        | Dorea                 | 0.1000%  | 0.2742%  | 0.0051             | NA                   |
| Bacteria   | Firmicutes     | Clostridia          | Clostridiales      | Ruminococcaceae        | Ruthenibacterium      | 0.1952%  | 0.0277%  | 0.0065             | NA                   |
| Bacteria   | Firmicutes     | Clostridia          | Clostridiales      | Lachnospiraceae        | Coprococcus           | 0.6192%  | 1.1393%  | 0.0178             | NA                   |
| Bacteria   | Firmicutes     | Erysipelotrichia    | Erysipelotrichales | Erysipelotrichaceae    | Holdemania            | 0.0000%  | 0.0040%  | 0.0198             | NA                   |
| Bacteria   | Firmicutes     | Clostridia          | Clostridiales      | Lachnospiraceae        | Fusicatenibacter      | 0.2271%  | 0.5500%  | 0.0231             | NA                   |
| Bacteria   | Firmicutes     | Clostridia          | Clostridiales      | Ruminococcaceae        | Gemmiger              | 0.2292%  | 1.6986%  | 0.0326             | NA                   |
| Bacteria   | Firmicutes     | Clostridia          | Clostridiales      | Peptostreptococcaceae  | Romboutsia            | 0.1579%  | 0.6385%  | 0.0356             | NA                   |
| Bacteria   | Firmicutes     | Clostridia          | Clostridiales      | Hungateiclostridiaceae | Hungateiclostridium   | 0.0677%  | 0.1065%  | 0.0386             | NA                   |
| Bacteria   | Firmicutes     | Clostridia          | Clostridiales      | Lachnospiraceae        | Parasporobacterium    | 0.0000%  | 0.0118%  | 0.0402             | NA                   |
| Bacteria   | Firmicutes     | Clostridia          | Clostridiales      | Lachnospiraceae        | Tyzzereella           | 0.0000%  | 0.0035%  | 0.0402             | NA                   |
| Bacteria   | Synergistetes  | Synergistia         | Synergistales      | Synergistaceae         | Cloacibacillus        | 0.0416%  | 0.0026%  | 0.0521             | NA                   |
| Bacteria   | Firmicutes     | Clostridia          | Clostridiales      | Ruminococcaceae        | Agathobaculum         | 0.0175%  | 0.1270%  | 0.0622             | NA                   |
| Bacteria   | Proteobacteria | Gammaproteobacteria | Enterobacterales   | Morganellaceae         | Providencia           | 0.1732%  | 0.0000%  | 0.0806             | NA                   |
| Bacteria   | Actinobacteria | Actinobacteria      | Corynebacteriales  | Corynebacteriaceae     | Corynebacterium       | 0.0190%  | 0.0000%  | 0.0806             | NA                   |
| Bacteria   | Proteobacteria | Gammaproteobacteria | Enterobacterales   | Enterobacteriaceae     | Raoultella            | 0.0116%  | 0.0000%  | 0.0806             | NA                   |
| Bacteria   | Proteobacteria | Gammaproteobacteria | Enterobacterales   | Enterobacteriaceae     | Klebsiella            | 0.0029%  | 0.0000%  | 0.0806             | NA                   |

|          |                |                       |                    |                                          |                       |         |         |        |    |
|----------|----------------|-----------------------|--------------------|------------------------------------------|-----------------------|---------|---------|--------|----|
| Bacteria | Proteobacteria | Gammaproteobacteria   | Enterobacterales   | Enterobacteriaceae                       | Enterobacter          | 0.0027% | 0.0000% | 0.0806 | NA |
| Bacteria | Firmicutes     | Tissierellia          | Tissierellales     | Peptoniphilaceae                         | Peptoniphilus         | 0.0015% | 0.0000% | 0.0806 | NA |
| Bacteria | Firmicutes     | Bacilli               | Lactobacillales    | Lactobacillaceae                         | Pediococcus           | 0.0000% | 0.0043% | 0.0806 | NA |
| Bacteria | Firmicutes     | Clostridia            | Clostridiales      | Ruminococcaceae                          | Subdoligranulum       | 0.0000% | 0.0024% | 0.0806 | NA |
| Bacteria | Firmicutes     | Clostridia            | Clostridiales      | Ruminococcaceae                          | Harryflintia          | 0.0074% | 0.0007% | 0.0816 | NA |
| Bacteria | Bacteroidetes  | Bacteroidia           | Bacteroidales      | Prevotellaceae                           | Paraprevotella        | 0.3008% | 0.2271% | 0.0824 | NA |
| Bacteria | Firmicutes     | Clostridia            | Clostridiales      |                                          | Natranaerovirga       | 0.0063% | 0.3883% | 0.0895 | NA |
| Bacteria | Actinobacteria | Coriobacteriia        | Eggerthellales     | Eggerthellaceae                          | Slackia               | 0.0021% | 0.0346% | 0.0895 | NA |
| Bacteria | Firmicutes     | Clostridia            | Clostridiales      | Ruminococcaceae                          | Acetivibrio           | 0.0045% | 0.0855% | 0.0986 | NA |
| Bacteria | Proteobacteria | Betaproteobacteria    | Burkholderiales    | Burkholderiaceae                         | Lautropia             | 0.0030% | 0.0011% | 0.1072 | NA |
| Bacteria | Bacteroidetes  | Bacteroidia           | Bacteroidales      | Barnesiellaceae                          | Barnesiella           | 0.2736% | 1.4190% | 0.1090 | NA |
| Bacteria | Firmicutes     | Clostridia            | Clostridiales      | Lachnospiraceae                          | Lachnospira           | 0.1088% | 0.1004% | 0.1121 | NA |
| Bacteria | Firmicutes     | Clostridia            | Clostridiales      | Lachnospiraceae                          | Roseburia             | 0.2200% | 0.2552% | 0.1181 | NA |
| Bacteria | Firmicutes     | Clostridia            | Clostridiales      | Clostridiaceae                           | Butyricoccus          | 0.0198% | 0.0200% | 0.1262 | NA |
| Bacteria | Firmicutes     | Clostridia            | Clostridiales      | Lachnospiraceae                          | Pseudobutyrvibrio     | 0.0090% | 0.0357% | 0.1290 | NA |
| Bacteria | Firmicutes     | Clostridia            | Clostridiales      | Clostridiaceae                           | Caloramator           | 0.1799% | 0.0703% | 0.1532 | NA |
| Bacteria | Proteobacteria | Gammaproteobacteria   | Enterobacterales   | Morganellaceae                           | Proteus               | 0.5010% | 0.0000% | 0.1626 | NA |
| Bacteria | Firmicutes     | Clostridia            | Clostridiales      | Lachnospiraceae                          | Abyssivirga           | 0.1619% | 0.0000% | 0.1626 | NA |
| Bacteria | Firmicutes     | Tissierellia          | Tissierellales     | Tissierellaceae                          |                       | 0.1566% | 0.0000% | 0.1626 | NA |
| Bacteria | Bacteroidetes  | Bacteroidia           | Bacteroidales      | Prevotellaceae                           | Marseilla             | 0.0110% | 0.0000% | 0.1626 | NA |
| Bacteria | Tenericutes    | Mollicutes            | Acholeplasmatales  | Acholeplasmataceae                       | Acholeplasma          | 0.0037% | 0.0000% | 0.1626 | NA |
| Bacteria | Proteobacteria | Gammaproteobacteria   | Enterobacterales   | Enterobacteriaceae                       | Shigella              | 0.0024% | 0.0000% | 0.1626 | NA |
| Bacteria | Firmicutes     | Clostridia            | Clostridiales      | Peptostreptococcaceae                    | Peptostreptococcus    | 0.0007% | 0.0000% | 0.1626 | NA |
| Bacteria | Firmicutes     | Tissierellia          | Tissierellales     | Peptoniphilaceae                         | Parvimonas            | 0.0007% | 0.0000% | 0.1626 | NA |
| Bacteria | Bacteroidetes  | Flavobacteriia        | Flavobacteriales   | Flavobacteriaceae                        | Cloacibacterium       | 0.0007% | 0.0000% | 0.1626 | NA |
| Bacteria | Proteobacteria | Gammaproteobacteria   | Cardiobacteriales  | Cardiobacteriaceae                       | Cardiobacterium       | 0.0006% | 0.0000% | 0.1626 | NA |
| Bacteria | Actinobacteria | Coriobacteriia        | Coriobacteriales   | Atopobiaceae                             | Olsenella             | 0.0000% | 0.0021% | 0.1626 | NA |
| Bacteria | Firmicutes     | Clostridia            | Clostridiales      | Peptostreptococcaceae                    | Clostridioides        | 0.0000% | 0.0045% | 0.1626 | NA |
| Bacteria | Firmicutes     | Erysipelotrichia      | Erysipelotrichales | Erysipelotrichaceae                      | Faecalibaculum        | 0.0000% | 0.0006% | 0.1626 | NA |
| Bacteria | Proteobacteria | Alphaproteobacteria   | Rhodospirillales   | Rhodospirillaceae                        | Fodinicurvata         | 0.0000% | 0.0055% | 0.1626 | NA |
| Bacteria | Proteobacteria | Alphaproteobacteria   | Rhodospirillales   | Rhodospirillaceae                        | Novispirillum         | 0.0000% | 2.1505% | 0.1626 | NA |
| Bacteria | Firmicutes     | Clostridia            | Clostridiales      | Lachnospiraceae                          | Lachnoclostridium     | 0.2231% | 0.5101% | 0.1635 | NA |
| Bacteria | Firmicutes     | Clostridia            | Clostridiales      | Lachnospiraceae                          | Murimonas             | 0.0056% | 0.0207% | 0.1663 | NA |
| Bacteria | Firmicutes     | Clostridia            | Clostridiales      | Lachnospiraceae                          | Kineothrix            | 0.1270% | 0.2300% | 0.1717 | NA |
| Bacteria | Firmicutes     | Erysipelotrichia      | Erysipelotrichales | Erysipelotrichaceae                      | Catenibacterium       | 0.3080% | 0.2131% | 0.1760 | NA |
| Bacteria | Firmicutes     | Clostridia            | Clostridiales      | Ruminococcaceae                          | Anaeromassilibacillus | 0.0267% | 0.0374% | 0.1932 | NA |
| Bacteria | Proteobacteria | Epsilonproteobacteria | Campylobacteriales | Campylobacteraceae                       | Campylobacter         | 0.0008% | 0.0016% | 0.1955 | NA |
| Bacteria | Firmicutes     | Clostridia            | Clostridiales      | Clostridiales_Family_XIII_Incertae_Sedis | Emergencia            | 0.0018% | 0.0071% | 0.2129 | NA |
| Bacteria | Firmicutes     | Clostridia            | Clostridiales      |                                          | Intestinimonas        | 0.4951% | 0.0279% | 0.2276 | NA |
| Bacteria | Bacteroidetes  | Bacteroidia           | Bacteroidales      | Odoribacteraceae                         | Odoribacter           | 0.3983% | 0.2328% | 0.2321 | NA |
| Bacteria | Firmicutes     | Clostridia            | Clostridiales      | Lachnospiraceae                          | Lachnobacterium       | 0.0034% | 0.0107% | 0.2439 | NA |
| Bacteria | Firmicutes     | Negativicutes         | Veillonellales     | Veillonellaceae                          | Dialister             | 0.6245% | 1.7390% | 0.2506 | NA |
| Bacteria | Actinobacteria | Coriobacteriia        | Eggerthellales     | Eggerthellaceae                          | Eggerthella           | 0.0906% | 0.0374% | 0.2565 | NA |
| Bacteria | Firmicutes     | Clostridia            | Clostridiales      | Lachnospiraceae                          | Faecalicatena         | 0.0094% | 0.0017% | 0.2592 | NA |
| Bacteria | Firmicutes     | Bacilli               | Lactobacillales    | Streptococcaceae                         | Streptococcus         | 0.4133% | 0.7426% | 0.2597 | NA |
| Bacteria | Firmicutes     | Bacilli               | Lactobacillales    | Leuconostocaceae                         | Leuconostoc           | 0.0044% | 0.0039% | 0.2614 | NA |
| Bacteria | Firmicutes     | Negativicutes         | Veillonellales     | Veillonellaceae                          | Veillonella           | 0.2519% | 0.3478% | 0.2637 | NA |
| Bacteria | Proteobacteria | Gammaproteobacteria   | Pseudomonadales    | Pseudomonadaceae                         | Pseudomonas           | 0.3030% | 0.0018% | 0.2753 | NA |



|          |                     |                     |                         |                          |                        |         |         |        |    |
|----------|---------------------|---------------------|-------------------------|--------------------------|------------------------|---------|---------|--------|----|
| Bacteria | Firmicutes          | Clostridia          | Clostridiales           | Lachnospiraceae          | Anaerotaenia           | 0.0369% | 0.0332% | 0.2782 | NA |
| Bacteria | Firmicutes          | Clostridia          | Clostridiales           | Ruminococcaceae          | Acetanaerobacterium    | 0.2209% | 0.3325% | 0.3095 | NA |
| Bacteria | Firmicutes          | Clostridia          | Clostridiales           | Lachnospiraceae          | Anaerotignum           | 0.0048% | 0.0241% | 0.3170 | NA |
| Bacteria | Firmicutes          | Clostridia          | Clostridiales           | Eubacteriaceae           | Rhabdanaerobium        | 0.0064% | 0.0022% | 0.3236 | NA |
| Bacteria | Firmicutes          | Clostridia          | Clostridiales           | Ruminococcaceae          | Papillibacter          | 0.0263% | 0.0019% | 0.3273 | NA |
| Bacteria | Proteobacteria      | Betaproteobacteria  | Burkholderiales         | Sutterellaceae           | Duodenibacillus        | 0.0020% | 0.0350% | 0.3273 | NA |
| Bacteria | Firmicutes          | Erysipelotrichia    | Erysipelotrichales      | Erysipelotrichaceae      | Erysipelatoclostridium | 0.1159% | 0.4159% | 0.3350 | NA |
| Bacteria | Firmicutes          | Bacilli             | Bacillales              | Planococcaceae           | Sporosarcina           | 0.1462% | 0.0000% | 0.3421 | NA |
| Bacteria | Firmicutes          | Bacilli             | Bacillales              | Planococcaceae           | Solibacillus           | 0.0912% | 0.0000% | 0.3421 | NA |
| Bacteria | Firmicutes          | Bacilli             | Bacillales              | Bacillaceae              | Lysinibacillus         | 0.0860% | 0.0000% | 0.3421 | NA |
| Bacteria | Firmicutes          | Clostridia          | Clostridiales           | Clostridiaceae           | Alkaliphilus           | 0.0546% | 0.0000% | 0.3421 | NA |
| Bacteria | Actinobacteria      | Actinobacteria      | Streptomycetales        | Streptomycetaceae        | Streptomyces           | 0.0230% | 0.0000% | 0.3421 | NA |
| Bacteria | Bacteroidetes       | Sphingobacteriia    | Sphingobacteriales      | Sphingobacteriaceae      | Solitaea               | 0.0116% | 0.0000% | 0.3421 | NA |
| Archaea  | Euryarchaeota       | Thermoplasmata      | Methanomassiliicoccales | Methanomassiliicoccaceae | Methanomassiliicoccus  | 0.0090% | 0.0000% | 0.3421 | NA |
| Bacteria | Bacteroidetes       | Bacteroidia         | Bacteroidales           | Muribaculaceae           | Muribaculum            | 0.0045% | 0.0000% | 0.3421 | NA |
| Bacteria | Firmicutes          | Clostridia          | Thermoanaerobacterales  | Thermoanaerobacteraceae  | Tepidanaerobacter      | 0.0042% | 0.0000% | 0.3421 | NA |
| Bacteria | Fusobacteria        | Fusobacteriia       | Fusobacteriales         | Fusobacteriaceae         | Cetobacterium          | 0.0034% | 0.0000% | 0.3421 | NA |
| Bacteria | Bacteroidetes       | Bacteroidia         | Bacteroidales           | Paludibacteraceae        | Paludibacter           | 0.0031% | 0.0000% | 0.3421 | NA |
| Bacteria | Firmicutes          | Erysipelotrichia    | Erysipelotrichales      | Erysipelotrichaceae      | Breznakia              | 0.0029% | 0.0000% | 0.3421 | NA |
| Bacteria | Bacteroidetes       | Flavobacteriia      | Flavobacteriales        | Flavobacteriaceae        | Flavobacterium         | 0.0027% | 0.0000% | 0.3421 | NA |
| Bacteria | Deinococcus.Thermus | Deinococci          | Deinococcales           | Deinococcaceae           | Deinococcus            | 0.0025% | 0.0000% | 0.3421 | NA |
| Bacteria | Firmicutes          | Clostridia          | Clostridiales           | Lachnospiraceae          | Cellulosilyticum       | 0.0024% | 0.0000% | 0.3421 | NA |
| Bacteria | Proteobacteria      | Gammaproteobacteria | Enterobacterales        | Erwiniaceae              | Pantoea                | 0.0023% | 0.0000% | 0.3421 | NA |
| Bacteria | Firmicutes          | Tissierella         |                         |                          | Sedimentibacter        | 0.0020% | 0.0000% | 0.3421 | NA |
| Bacteria | Firmicutes          | Clostridia          | Clostridiales           | Peptococcaceae           | Peptococcus            | 0.0018% | 0.0000% | 0.3421 | NA |
| Bacteria | Proteobacteria      | Deltaproteobacteria | Desulfovibrionales      | Desulfovibrionaceae      | Mailhella              | 0.0012% | 0.0000% | 0.3421 | NA |
| Bacteria | Firmicutes          | Bacilli             | Bacillales              | Thermoactinomycetaceae   | Marinithermofilum      | 0.0012% | 0.0000% | 0.3421 | NA |
| Bacteria | Proteobacteria      | Gammaproteobacteria | Enterobacterales        | Enterobacteriaceae       | Kluyvera               | 0.0012% | 0.0000% | 0.3421 | NA |
| Bacteria | Firmicutes          | Clostridia          | Clostridiales           | Clostridiaceae           | Brassicibacter         | 0.0011% | 0.0000% | 0.3421 | NA |
| Bacteria | Firmicutes          | Clostridia          | Clostridiales           | Peptococcaceae           | Desulfohalotomaculum   | 0.0010% | 0.0000% | 0.3421 | NA |
| Bacteria | Proteobacteria      | Gammaproteobacteria | Oceanospirillales       | Endozoicomonadaceae      | Endozoicomonas         | 0.0010% | 0.0000% | 0.3421 | NA |
| Bacteria | Proteobacteria      | Deltaproteobacteria | Myxococcales            | Polyangiaceae            | Chondromyces           | 0.0009% | 0.0000% | 0.3421 | NA |
| Bacteria | Firmicutes          | Clostridia          | Clostridiales           | Hungateiclostridiaceae   | Magaeibacillus         | 0.0009% | 0.0000% | 0.3421 | NA |
| Bacteria | Firmicutes          | Tissierella         |                         |                          | Dethiosulfatibacter    | 0.0009% | 0.0000% | 0.3421 | NA |
| Bacteria | Proteobacteria      | Gammaproteobacteria | Enterobacterales        | Enterobacteriaceae       | Salmonella             | 0.0008% | 0.0000% | 0.3421 | NA |
| Bacteria | Actinobacteria      | Actinobacteria      | Kineosporiales          | Kineosporiaceae          | Kineococcus            | 0.0008% | 0.0000% | 0.3421 | NA |
| Bacteria | Firmicutes          | Bacilli             | Lactobacillales         | Aerococcaceae            | Abiotrophia            | 0.0007% | 0.0000% | 0.3421 | NA |
| Bacteria | Firmicutes          | Bacilli             | Bacillales              |                          | Exiguobacterium        | 0.0007% | 0.0000% | 0.3421 | NA |
| Bacteria | Firmicutes          | Bacilli             | Bacillales              | Staphylococcaceae        | Staphylococcus         | 0.0006% | 0.0000% | 0.3421 | NA |
| Bacteria | Bacteroidetes       | Chitinophagia       | Chitinophagales         | Chitinophagaceae         | Ferruginibacter        | 0.0004% | 0.0000% | 0.3421 | NA |
| Bacteria | Fusobacteria        | Fusobacteriia       | Fusobacteriales         | Leptotrichiaceae         | Leptotrichia           | 0.0004% | 0.0000% | 0.3421 | NA |
| Bacteria | Synergistetes       | Synergistia         | Synergistales           | Synergistaceae           | Fretibacterium         | 0.0004% | 0.0000% | 0.3421 | NA |
| Bacteria | Firmicutes          | Erysipelotrichia    | Erysipelotrichales      | Erysipelotrichaceae      | Solobacterium          | 0.0003% | 0.0000% | 0.3421 | NA |
| Bacteria | Proteobacteria      | Deltaproteobacteria | Desulfuromonadales      | Desulfuromonadaceae      | Pelobacter             | 0.0003% | 0.0000% | 0.3421 | NA |
| Bacteria | Actinobacteria      | Actinobacteria      | Corynebacteriales       | Mycobacteriaceae         | Mycolicibacterium      | 0.0002% | 0.0000% | 0.3421 | NA |
| Bacteria | Bacteroidetes       | Chitinophagia       | Chitinophagales         | Chitinophagaceae         | Flavitaea              | 0.0002% | 0.0000% | 0.3421 | NA |
| Bacteria | Proteobacteria      | Alphaproteobacteria | Rhizobiales             |                          | Nordella               | 0.0002% | 0.0000% | 0.3421 | NA |
| Bacteria | Proteobacteria      | Alphaproteobacteria | Rhizobiales             | Phyllobacteriaceae       | Roseitalea             | 0.0002% | 0.0000% | 0.3421 | NA |

|          |                |                     |                     |                                          |                     |         |         |        |    |
|----------|----------------|---------------------|---------------------|------------------------------------------|---------------------|---------|---------|--------|----|
| Bacteria | Proteobacteria | Alphaproteobacteria | Sphingomonadales    | Erythrobacteraceae                       | Altererythrobacter  | 0.0002% | 0.0000% | 0.3421 | NA |
| Bacteria | Firmicutes     | Clostridia          | Clostridiales       | Eubacteriaceae                           | Pseudoramibacter    | 0.0002% | 0.0000% | 0.3421 | NA |
| Bacteria | Proteobacteria | Betaproteobacteria  | Burkholderiales     | Comamonadaceae                           | Acidovorax          | 0.0002% | 0.0000% | 0.3421 | NA |
| Bacteria | Proteobacteria | Betaproteobacteria  | Burkholderiales     | Comamonadaceae                           | Kinneretia          | 0.0001% | 0.0000% | 0.3421 | NA |
| Bacteria | Actinobacteria | Actinobacteria      | Actinomycetales     | Actinomycetaceae                         | Actinobaculum       | 0.0000% | 0.0002% | 0.3421 | NA |
| Bacteria | Actinobacteria | Actinobacteria      | Propionibacteriales | Propionibacteriaceae                     | Propionibacterium   | 0.0000% | 0.0005% | 0.3421 | NA |
| Bacteria | Bacteroidetes  | Bacteroidia         | Bacteroidales       | Bacteroidaceae                           | Mediterranea        | 0.0000% | 0.1853% | 0.3421 | NA |
| Bacteria | Bacteroidetes  | Flavobacteriia      | Flavobacteriales    | Flavobacteriaceae                        | Aurantiacella       | 0.0000% | 0.0053% | 0.3421 | NA |
| Bacteria | Firmicutes     | Bacilli             | Bacillales          | Bacillaceae                              | Cerasibacillus      | 0.0000% | 0.0008% | 0.3421 | NA |
| Bacteria | Firmicutes     | Bacilli             | Bacillales          | Paenibacillaceae                         | Paenibacillus       | 0.0000% | 0.0038% | 0.3421 | NA |
| Bacteria | Firmicutes     | Clostridia          | Clostridiales       |                                          |                     | 0.0000% | 0.0013% | 0.3421 | NA |
| Bacteria | Firmicutes     | Clostridia          | Clostridiales       | Clostridiaceae                           | Beduini             | 0.0000% | 0.0014% | 0.3421 | NA |
| Bacteria | Firmicutes     | Clostridia          | Clostridiales       | Clostridiaceae                           | Falcatimonas        | 0.0000% | 0.0011% | 0.3421 | NA |
| Bacteria | Firmicutes     | Clostridia          | Clostridiales       | Eubacteriaceae                           | Irregularibacter    | 0.0000% | 0.0013% | 0.3421 | NA |
| Bacteria | Firmicutes     | Clostridia          | Clostridiales       | Lachnospiraceae                          | Lachnospirium       | 0.0000% | 0.0010% | 0.3421 | NA |
| Bacteria | Firmicutes     | Clostridia          | Clostridiales       | Lachnospiraceae                          | Anaerocolumna       | 0.0000% | 0.0420% | 0.3421 | NA |
| Bacteria | Firmicutes     | Clostridia          | Clostridiales       | Lachnospiraceae                          | Faecalimonas        | 0.0000% | 0.0008% | 0.3421 | NA |
| Bacteria | Firmicutes     | Clostridia          | Clostridiales       | Lachnospiraceae                          | Mobilitalea         | 0.0000% | 0.0074% | 0.3421 | NA |
| Bacteria | Firmicutes     | Clostridia          | Clostridiales       | Lachnospiraceae                          | Muricomes           | 0.0000% | 0.0003% | 0.3421 | NA |
| Bacteria | Firmicutes     | Clostridia          | Clostridiales       | Lachnospiraceae                          | Oribacterium        | 0.0000% | 0.0004% | 0.3421 | NA |
| Bacteria | Firmicutes     | Clostridia          | Clostridiales       | Lachnospiraceae                          | Sellimonas          | 0.0000% | 0.0013% | 0.3421 | NA |
| Bacteria | Firmicutes     | Clostridia          | Clostridiales       | Lachnospiraceae                          | Shuttleworthia      | 0.0000% | 0.0004% | 0.3421 | NA |
| Bacteria | Firmicutes     | Clostridia          | Clostridiales       | Peptostreptococcaceae                    | Paraclostridium     | 0.0000% | 0.0014% | 0.3421 | NA |
| Bacteria | Firmicutes     | Clostridia          | Clostridiales       | Ruminococcaceae                          | Fournierella        | 0.0000% | 0.0014% | 0.3421 | NA |
| Bacteria | Firmicutes     | Negativicutes       | Selenomonadales     | Selenomonadaceae                         | Selenomonas         | 0.0000% | 0.0015% | 0.3421 | NA |
| Bacteria | Firmicutes     | Negativicutes       | Veillonellales      | Veillonellaceae                          | Caecibacter         | 0.0000% | 0.0015% | 0.3421 | NA |
| Bacteria | Firmicutes     | Tissierellia        | Tissierellales      | Tissierellaceae                          | Urmittel            | 0.0000% | 0.0195% | 0.3421 | NA |
| Bacteria | Proteobacteria | Alphaproteobacteria | Rhodobacteriales    | Hyphomonadaceae                          | Fretibacter         | 0.0000% | 0.0013% | 0.3421 | NA |
| Bacteria | Proteobacteria | Alphaproteobacteria | Rhodospirillales    | Rhodospirillaceae                        | Aestuariuspira      | 0.0000% | 0.0011% | 0.3421 | NA |
| Bacteria | Proteobacteria | Gammaproteobacteria | Pseudomonadales     | Moraxellaceae                            | Acinetobacter       | 0.0000% | 0.0014% | 0.3421 | NA |
| Archaea  | Euryarchaeota  | Methanobacteria     | Methanobacteriales  | Methanobacteriaceae                      | Methanobrevibacter  | 0.1128% | 0.0032% | 0.3492 | NA |
| Bacteria | Firmicutes     | Erysipelotrichia    | Erysipelotrichales  | Erysipelotrichaceae                      | Massiliomicrobiota  | 0.0063% | 0.0022% | 0.3497 | NA |
| Bacteria | Firmicutes     | Clostridia          | Clostridiales       | Ruminococcaceae                          | Anaerotruncus       | 0.0022% | 0.0021% | 0.3497 | NA |
| Bacteria | Firmicutes     | Clostridia          | Clostridiales       | Defluviitaleaceae                        | Defluviitalea       | 0.0017% | 0.0011% | 0.3497 | NA |
| Bacteria | Firmicutes     | Clostridia          | Clostridiales       | Lachnospiraceae                          | Lachnoanaerobaculum | 0.0011% | 0.0014% | 0.3497 | NA |
| Bacteria | Proteobacteria | Betaproteobacteria  | Neisseriales        | Neisseriaceae                            | Neisseria           | 0.0010% | 0.0007% | 0.3497 | NA |
| Bacteria | Firmicutes     | Negativicutes       | Veillonellales      | Veillonellaceae                          | Megasphaera         | 0.0010% | 0.0059% | 0.3721 | NA |
| Bacteria | Firmicutes     | Bacilli             | Lactobacillales     | Streptococcaceae                         | Lactococcus         | 0.0702% | 0.0211% | 0.4162 | NA |
| Bacteria | Firmicutes     | Bacilli             | Lactobacillales     | Carnobacteriaceae                        | Granulicatella      | 0.0124% | 0.0069% | 0.4325 | NA |
| Bacteria | Firmicutes     | Clostridia          | Clostridiales       | Ruminococcaceae                          | Sporobacter         | 0.6028% | 0.5215% | 0.4389 | NA |
| Bacteria | Firmicutes     | Clostridia          | Clostridiales       | Lachnospiraceae                          | Anaerostipes        | 0.1351% | 0.2504% | 0.4395 | NA |
| Bacteria | Firmicutes     | Clostridia          | Clostridiales       | Ruminococcaceae                          | Flavonifractor      | 0.0290% | 0.0127% | 0.4420 | NA |
| Bacteria | Firmicutes     | Clostridia          | Clostridiales       | Ruminococcaceae                          | Paludicola          | 0.0320% | 0.0056% | 0.4450 | NA |
| Bacteria | Firmicutes     | Clostridia          | Clostridiales       | Clostridiales_Family_XIII_Incertae_Sedis | Ihubacter           | 0.0014% | 0.0023% | 0.4461 | NA |
| Bacteria | Firmicutes     | Clostridia          | Clostridiales       | Clostridiaceae                           | Lutispora           | 0.0182% | 0.0075% | 0.4635 | NA |
| Bacteria | Proteobacteria | Betaproteobacteria  | Burkholderiales     | Sutterellaceae                           | Sutterella          | 0.1494% | 0.2653% | 0.4759 | NA |
| Bacteria | Lentisphaerae  | Lentisphaeria       | Victivallales       | Victivallaceae                           | Victivallis         | 0.0740% | 0.0178% | 0.4810 | NA |
| Bacteria | Firmicutes     | Clostridia          | Clostridiales       | Ruminococcaceae                          | Ethanoligenes       | 0.0529% | 0.0113% | 0.4835 | NA |

|          |                 |                     |                    |                                          |                       |         |         |        |    |
|----------|-----------------|---------------------|--------------------|------------------------------------------|-----------------------|---------|---------|--------|----|
| Bacteria | Firmicutes      | Clostridia          | Clostridiales      | Clostridiaceae                           | Clostridium           | 0.5610% | 0.3347% | 0.4858 | NA |
| Bacteria | Firmicutes      | Clostridia          | Clostridiales      | Ruminococcaceae                          |                       | 0.6175% | 1.5618% | 0.4899 | NA |
| Bacteria | Firmicutes      | Erysipelotrichia    | Erysipelotrichales | Erysipelotrichaceae                      | Turcibacter           | 0.0641% | 0.0226% | 0.5060 | NA |
| Bacteria | Firmicutes      | Clostridia          | Clostridiales      | Ruminococcaceae                          | Pseudoflavonifractor  | 0.0310% | 0.0161% | 0.5247 | NA |
| Bacteria | Proteobacteria  | Betaproteobacteria  | Burkholderiales    | Comamonadaceae                           | Comamonas             | 0.1258% | 0.0060% | 0.5341 | NA |
| Bacteria | Firmicutes      | Clostridia          | Clostridiales      | Hungateiclostridiaceae                   | Saccharofermentans    | 0.0081% | 0.0013% | 0.5341 | NA |
| Bacteria | Firmicutes      | Clostridia          | Clostridiales      | Clostridiales_Family_XIII_Incertae_Sedis | Anaerovorax           | 0.0003% | 0.0023% | 0.5341 | NA |
| Bacteria | Firmicutes      | Clostridia          | Clostridiales      | Ruminococcaceae                          | Negativibacillus      | 0.0062% | 0.0034% | 0.5356 | NA |
| Bacteria | Firmicutes      | Bacilli             | Bacillales         |                                          | Gemella               | 0.0017% | 0.0011% | 0.5356 | NA |
| Bacteria | Actinobacteria  | Actinobacteria      | Micrococcales      | Micrococcaceae                           | Rothia                | 0.0113% | 0.0128% | 0.5488 | NA |
| Bacteria | Firmicutes      | Erysipelotrichia    | Erysipelotrichales | Erysipelotrichaceae                      | Coprobacillus         | 0.0093% | 0.0314% | 0.5614 | NA |
| Bacteria | Firmicutes      | Tissierella         | Tissierellales     | Peptoniphilaceae                         | Anaerococcus          | 0.0049% | 0.0004% | 0.5737 | NA |
| Bacteria | Firmicutes      | Clostridia          | Clostridiales      | Catabacteriaceae                         | Catabacter            | 0.0027% | 0.0008% | 0.5737 | NA |
| Bacteria | Firmicutes      | Clostridia          | Clostridiales      | Clostridiaceae                           | Hungatella            | 0.0025% | 0.0008% | 0.5737 | NA |
| Bacteria | Firmicutes      | Negativicutes       | Acidaminococcales  | Acidaminococcaceae                       | Acidaminococcus       | 0.0018% | 0.0075% | 0.5737 | NA |
| Bacteria | Actinobacteria  | Actinobacteria      | Actinomycetales    | Actinomycetaceae                         | Schaalia              | 0.0275% | 0.0013% | 0.5917 | NA |
| Bacteria | Proteobacteria  | Betaproteobacteria  | Burkholderiales    | Sutterellaceae                           | Parasutterella        | 0.0070% | 0.0342% | 0.5917 | NA |
| Bacteria | Firmicutes      | Tissierella         | Tissierellales     | Tissierellaceae                          | Anaerosalibacter      | 0.1748% | 0.1944% | 0.6147 | NA |
| Bacteria | Firmicutes      | Bacilli             | Bacillales         | Bacillaceae                              | Pseudogracilibacillus | 0.1377% | 3.3097% | 0.6147 | NA |
| Bacteria | Firmicutes      | Bacilli             | Bacillales         | Bacillaceae                              | Virgibacillus         | 0.0335% | 4.1551% | 0.6147 | NA |
| Bacteria | Bacteroidetes   | Bacteroidia         | Bacteroidales      | Prevotellaceae                           | Massiliprevotella     | 0.0081% | 0.0410% | 0.6147 | NA |
| Bacteria | Bacteroidetes   | Bacteroidia         | Bacteroidales      | Porphyromonadaceae                       | Gabonibacter          | 0.0054% | 0.0035% | 0.6147 | NA |
| Bacteria | Cyanobacteria   |                     | Oscillatoriales    | Oscillatoriaceae                         | Aerosakkonema         | 0.0037% | 0.0006% | 0.6147 | NA |
| Bacteria | Actinobacteria  | Coriobacteriia      | Coriobacteriales   | Atopobiaceae                             | Atopobium             | 0.0020% | 0.0009% | 0.6147 | NA |
| Bacteria | Firmicutes      | Clostridia          | Clostridiales      | Peptostreptococcaceae                    | Intestinibacter       | 0.0015% | 0.0014% | 0.6147 | NA |
| Bacteria | Firmicutes      | Clostridia          | Clostridiales      | Lachnospiraceae                          | Eisenbergiella        | 0.0281% | 0.0100% | 0.6211 | NA |
| Bacteria | Firmicutes      | Clostridia          | Clostridiales      | Ruminococcaceae                          | Neglecta              | 0.0604% | 0.0410% | 0.6499 | NA |
| Bacteria | Firmicutes      | Bacilli             | Bacillales         | Bacillaceae                              | Bacillus              | 0.1177% | 0.0239% | 0.6547 | NA |
| Bacteria | Firmicutes      | Bacilli             | Lactobacillales    | Leuconostocaceae                         | Weissella             | 0.0226% | 0.0503% | 0.6689 | NA |
| Bacteria | Bacteroidetes   | Bacteroidia         | Bacteroidales      | Prevotellaceae                           | Prevotellamassilia    | 0.1176% | 0.5085% | 0.6705 | NA |
| Bacteria | Actinobacteria  | Coriobacteriia      | Coriobacteriales   | Coriobacteriaceae                        | Collinsella           | 0.1618% | 0.2126% | 0.7247 | NA |
| Bacteria | Verrucomicrobia | Verrucomicrobiae    | Verrucomicrobiales | Akkermansiaceae                          | Akkermansia           | 0.3907% | 0.0579% | 0.7508 | NA |
| Bacteria | Proteobacteria  | Betaproteobacteria  | Burkholderiales    | Oxalobacteraceae                         | Oxalobacter           | 0.0049% | 0.0113% | 0.7594 | NA |
| Bacteria | Firmicutes      | Negativicutes       | Selenomonadales    | Selenomonadaceae                         | Megamonas             | 0.2103% | 0.2678% | 0.7984 | NA |
| Bacteria | Actinobacteria  | Coriobacteriia      | Eggerthellales     | Eggerthellaceae                          | Raoultibacter         | 0.0045% | 0.0156% | 0.8970 | NA |
| Bacteria | Verrucomicrobia | Verrucomicrobiae    | Verrucomicrobiales | Verrucomicrobiaceae                      | Fucophilus            | 0.0505% | 0.1250% | 0.9150 | NA |
| Bacteria | Firmicutes      | Clostridia          | Clostridiales      |                                          | Howardella            | 0.0092% | 0.0117% | 0.9229 | NA |
| Bacteria | Firmicutes      | Negativicutes       | Veillonellales     | Veillonellaceae                          | Allisonella           | 0.0015% | 0.0040% | 0.9306 | NA |
| Bacteria | Firmicutes      | Clostridia          | Clostridiales      | Lachnospiraceae                          | Hespellia             | 0.0012% | 0.0017% | 0.9306 | NA |
| Bacteria | Actinobacteria  | Actinobacteria      | Actinomycetales    | Actinomycetaceae                         | Actinomyces           | 0.0008% | 0.0009% | 0.9379 | NA |
| Bacteria | Firmicutes      | Bacilli             | Lactobacillales    | Enterococcaceae                          | Enterococcus          | 0.0565% | 0.1066% | 0.9430 | NA |
| Bacteria | Firmicutes      | Clostridia          | Clostridiales      | Hungateiclostridiaceae                   | Ruminiclostridium     | 0.2257% | 0.0277% | 0.9433 | NA |
| Bacteria | Firmicutes      | Clostridia          | Clostridiales      |                                          | Flintibacter          | 0.4052% | 0.5530% | 0.9461 | NA |
| Bacteria | Firmicutes      | Clostridia          | Clostridiales      |                                          | Monoglobus            | 0.0134% | 0.0050% | 0.9653 | NA |
| Bacteria | Proteobacteria  | Gammaproteobacteria | Enterobacteriales  | Hafniaceae                               | Hafnia                | 0.0046% | 0.0172% | 0.9653 | NA |
| Bacteria | Proteobacteria  | Gammaproteobacteria | Enterobacteriales  | Enterobacteriaceae                       | Cronobacter           | 0.0017% | 0.0023% | 0.9793 | NA |
| Bacteria | Bacteroidetes   | Bacteroidia         | Bacteroidales      | Prevotellaceae                           | Alloprevotella        | 0.1297% | 0.0761% | 0.9846 | NA |
| Bacteria | Firmicutes      | Bacilli             | Bacillales         | Bacillaceae                              | Oceanobacillus        | 0.5282% | 0.1395% | 1.0000 | NA |

|          |                |                     |                   |                                          |                   |         |         |        |    |
|----------|----------------|---------------------|-------------------|------------------------------------------|-------------------|---------|---------|--------|----|
| Bacteria | Firmicutes     | Clostridia          | Clostridiales     | Lachnospiraceae                          | Butyrivibrio      | 0.3387% | 0.1876% | 1.0000 | NA |
| Bacteria | Tenericutes    | Mollicutes          | Anaeroplasmatales | Anaeroplasmataceae                       | Anaeroplasma      | 0.2001% | 0.0003% | 1.0000 | NA |
| Bacteria | Firmicutes     | Bacilli             | Bacillales        | Planococcaceae                           | Rummeliibacillus  | 0.1441% | 2.2250% | 1.0000 | NA |
| Bacteria | Firmicutes     | Tissierella         | Tissierellales    | Tissierellaceae                          | Tissierella       | 0.0227% | 0.0058% | 1.0000 | NA |
| Bacteria | Bacteroidetes  | Bacteroidia         | Bacteroidales     | Barnesiellaceae                          | Coproacter        | 0.0131% | 0.0047% | 1.0000 | NA |
| Bacteria | Tenericutes    | Mollicutes          | Entomoplasmatales | Spiroplasmataceae                        | Spiroplasma       | 0.0080% | 0.0009% | 1.0000 | NA |
| Bacteria | Proteobacteria | Gammaproteobacteria | Aeromonadales     | Succinivibrionaceae                      | Succinivibrio     | 0.0035% | 0.0004% | 1.0000 | NA |
| Bacteria | Firmicutes     | Clostridia          | Clostridiales     | Ruminococcaceae                          | Caproiciproducens | 0.0029% | 0.0018% | 1.0000 | NA |
| Bacteria | Synergistetes  | Synergistia         | Synergistales     | Synergistaceae                           | Pyramidobacter    | 0.0012% | 0.0057% | 1.0000 | NA |
| Bacteria | Actinobacteria | Actinobacteria      | Bifidobacteriales | Bifidobacteriaceae                       | Scardovia         | 0.0009% | 0.0003% | 1.0000 | NA |
| Bacteria | Actinobacteria | Coriobacteriia      | Coriobacteriales  | Coriobacteriaceae                        | Senegalimassilia  | 0.0009% | 0.0003% | 1.0000 | NA |
| Bacteria | Actinobacteria | Coriobacteriia      | Eggerthellales    | Eggerthellaceae                          | Adlercreutzia     | 0.0007% | 0.0015% | 1.0000 | NA |
| Bacteria | Firmicutes     | Clostridia          | Clostridiales     | Clostridiales_Family_XIII_Incertae_Sedis | Mogibacterium     | 0.0007% | 0.0004% | 1.0000 | NA |
| Bacteria | Firmicutes     | Negativicutes       | Selenomonadales   | Selenomonadaceae                         | Mitsuokella       | 0.0005% | 0.0021% | 1.0000 | NA |

**Supplementary Table 2. Full taxonomic comparative analysis of oral microbiome**

| Kingdom    | Phylum              | Class                 | Order              | Family                | Genus             | STEMI    | Control  | Unadjusted P-value | FDR-adjusted P-value |
|------------|---------------------|-----------------------|--------------------|-----------------------|-------------------|----------|----------|--------------------|----------------------|
| Bacteria   | Bacteroidetes       | Bacteroidia           | Bacteroidales      | Bacteroidaceae        | Bacteroides       | 0.8630%  | 0.0522%  | 0.0002             | 0.0065               |
| Bacteria   | Firmicutes          | Bacilli               | Lactobacillales    | Carnobacteriaceae     | Granulicatella    | 1.2894%  | 0.4991%  | 0.005              | 0.0745               |
| Bacteria   | Bacteroidetes       | Bacteroidia           | Bacteroidales      | Prevotellaceae        | Alloprevotella    | 0.5845%  | 0.4838%  | 0.0247             | 0.1957               |
| Bacteria   | Proteobacteria      | Gammaproteobacteria   | Pasteurellales     | Pasteurellaceae       | Haemophilus       | 5.7948%  | 12.4364% | 0.0284             | 0.1957               |
| Bacteria   | Firmicutes          | Bacilli               | Lactobacillales    | Streptococcaceae      | Streptococcus     | 24.2930% | 38.2492% | 0.218              | 0.1957               |
| Bacteria   | Bacteroidetes       | Flavobacteriia        | Flavobacteriales   | Flavobacteriaceae     | Capnocytophaga    | 3.8586%  | 1.4046%  | 0.0418             | 0.2088               |
| Bacteria   | Bacteroidetes       | Bacteroidia           | Bacteroidales      | Porphyromonadaceae    | Porphyromonas     | 5.0350%  | 2.8145%  | 0.0675             | 0.2894               |
| Bacteria   | Actinobacteria      | Actinobacteria        | Actinomycetales    | Actinomycetaceae      | Schaalia          | 0.3601%  | 0.3117%  | 0.1162             | 0.4357               |
| Bacteria   | Proteobacteria      | Epsilonproteobacteria | Campylobacteriales | Campylobacteraceae    | Campylobacter     | 0.9428%  | 0.4859%  | 0.149              | 0.4965               |
| Bacteria   | Synergistetes       | Synergistia           | Synergistales      | Synergistaceae        | Fretibacterium    | 0.3883%  | 0.1282%  | 0.1661             | 0.4982               |
| Bacteria   | Bacteroidetes       | Bacteroidia           | Bacteroidales      | Tannerellaceae        | Tannerella        | 0.4506%  | 0.4670%  | 0.2122             | 0.5688               |
| Bacteria   | Proteobacteria      | Betaproteobacteria    | Neisseriales       | Neisseriaceae         | Neisseria         | 13.0602% | 8.3580%  | 0.2365             | 0.5688               |
| Bacteria   | Proteobacteria      | Betaproteobacteria    | Burkholderiales    | Burkholderiaceae      | Lautropia         | 8.0017%  | 2.0863%  | 0.2465             | 0.5688               |
| Bacteria   | Bacteroidetes       | Bacteroidia           | Bacteroidales      | Prevotellaceae        | Prevotella        | 7.3281%  | 5.3570%  | 0.3112             | 0.6222               |
| Unassigned | Unassigned          | Unassigned            | Unassigned         | Unassigned            | Unassigned        | 0.9949%  | 1.0226%  | 0.3112             | 0.6222               |
| Bacteria   | Spirochaetes        | Spirochaetia          | Spirochaetales     | Spirochaetaceae       | Treponema         | 1.0122%  | 0.6108%  | 0.3319             | 0.6222               |
| Bacteria   | Fusobacteria        | Fusobacteriia         | Fusobacteriales    | Fusobacteriaceae      | Fusobacterium     | 2.0903%  | 2.1788%  | 0.3752             | 0.6434               |
| Bacteria   | Bacteroidetes       | Bacteroidia           | Bacteroidales      | Prevotellaceae        | Metaprevotella    | 0.3626%  | 0.1027%  | 0.386              | 0.6434               |
| Bacteria   | Firmicutes          | Negativicutes         | Selenomonadales    | Selenomonadaceae      | Selenomonas       | 0.3760%  | 0.0985%  | 0.4089             | 0.6456               |
| Bacteria   | Fusobacteria        | Fusobacteriia         | Fusobacteriales    | Leptotrichiaceae      | Leptotrichia      | 1.9613%  | 1.6069%  | 0.5411             | 0.8117               |
| Bacteria   | Firmicutes          | Clostridia            | Clostridiales      | Peptostreptococcaceae | Filifactor        | 0.3377%  | 0.2165%  | 0.6002             | 0.8259               |
| Bacteria   | Firmicutes          | Bacilli               | Bacillales         |                       | Gemella           | 1.4470%  | 2.5724%  | 0.6056             | 0.8259               |
| Bacteria   | Firmicutes          | Negativicutes         | Veillonellales     | Veillonellaceae       | Veillonella       | 2.5755%  | 3.3427%  | 0.6447             | 0.8409               |
| Bacteria   | Actinobacteria      | Actinobacteria        | Actinomycetales    | Actinomycetaceae      | Actinomyces       | 0.4914%  | 0.9196%  | 0.687              | 0.8587               |
| Bacteria   | Tenericutes         | Mollicutes            | Mycoplasmatales    | Mycoplasmataceae      | Mycoplasma        | 0.5024%  | 0.3352%  | 0.7232             | 0.8678               |
| Bacteria   | Proteobacteria      | Gammaproteobacteria   | Cardiobacteriales  | Cardiobacteriaceae    | Cardiobacterium   | 0.3217%  | 0.2421%  | 0.7526             | 0.8684               |
| Bacteria   | Proteobacteria      | Gammaproteobacteria   | Pasteurellales     | Pasteurellaceae       | Aggregatibacter   | 0.6564%  | 0.4789%  | 0.8699             | 0.9604               |
| Bacteria   | Actinobacteria      | Actinobacteria        | Micrococcales      | Micrococcaceae        | Rothia            | 6.4780%  | 6.4948%  | 0.9107             | 0.9604               |
| Bacteria   | Firmicutes          | Negativicutes         | Selenomonadales    | Selenomonadaceae      | Centipeda         | 0.4612%  | 0.1010%  | 0.9284             | 0.9604               |
| Bacteria   | Firmicutes          | Clostridia            | Clostridiales      | Lachnospiraceae       | Oribacterium      | 0.3058%  | 0.2975%  | 0.9799             | 0.9799               |
| Bacteria   | Firmicutes          | Clostridia            | Clostridiales      | Ruminococcaceae       | Faecalibacterium  | 0.2419%  | 0.0003%  | 0.0013             | NA                   |
| Bacteria   | Firmicutes          | Clostridia            | Clostridiales      | Lachnospiraceae       | Lachnoclostridium | 0.1371%  | 0.0034%  | 0.0015             | NA                   |
| Bacteria   | Proteobacteria      | Betaproteobacteria    | Burkholderiales    | Comamonadaceae        | Acidovorax        | 0.0473%  | 0.0011%  | 0.0018             | NA                   |
| Bacteria   | Fusobacteria        | Fusobacteriia         | Fusobacteriales    | Fusobacteriaceae      | Cetobacterium     | 0.0769%  | 0.0000%  | 0.007              | NA                   |
| Bacteria   | Bacteroidetes       | Bacteroidia           | Bacteroidales      | Tannerellaceae        | Parabacteroides   | 0.0119%  | 0.0000%  | 0.007              | NA                   |
| Bacteria   | Firmicutes          | Clostridia            | Clostridiales      | Lachnospiraceae       | Kineothrix        | 0.0348%  | 0.0000%  | 0.0138             | NA                   |
| Bacteria   | Firmicutes          | Clostridia            | Clostridiales      | Ruminococcaceae       | Ruminococcus      | 0.0163%  | 0.0000%  | 0.0138             | NA                   |
| Bacteria   | Firmicutes          | Clostridia            | Clostridiales      | Lachnospiraceae       | Johnsonella       | 0.0767%  | 0.0102%  | 0.0208             | NA                   |
| Bacteria   | Proteobacteria      | Gammaproteobacteria   | Enterobacteriales  | Enterobacteriaceae    | Escherichia       | 0.0205%  | 0.0032%  | 0.0225             | NA                   |
| Bacteria   | Bacteroidetes       | Flavobacteriia        | Flavobacteriales   | Flavobacteriaceae     | Flavobacterium    | 0.1541%  | 0.0000%  | 0.0267             | NA                   |
| Bacteria   | Deinococcus.Thermus | Deinococci            | Deinococcales      | Deinococcaceae        | Deinococcus       | 0.0412%  | 0.0000%  | 0.0267             | NA                   |
| Bacteria   | Proteobacteria      | Deltaproteobacteria   | Desulfuromonadales | Desulfuromonadaceae   | Pelobacter        | 0.0169%  | 0.0000%  | 0.0267             | NA                   |
| Bacteria   | Firmicutes          | Clostridia            | Clostridiales      | Lachnospiraceae       |                   | 0.0243%  | 0.0006%  | 0.0301             | NA                   |
| Bacteria   | Firmicutes          | Clostridia            | Clostridiales      | Oscillospiraceae      | Oscillibacter     | 0.0482%  | 0.0005%  | 0.0351             | NA                   |

|          |                 |                     |                     |                      |                        |         |         |        |    |
|----------|-----------------|---------------------|---------------------|----------------------|------------------------|---------|---------|--------|----|
| Bacteria | Proteobacteria  | Gammaproteobacteria | Pseudomonadales     | Moraxellaceae        | Acinetobacter          | 0.0125% | 0.0339% | 0.0376 | NA |
| Bacteria | Bacteroidetes   | Bacteroidia         | Bacteroidales       | Rikenellaceae        | Alistipes              | 0.2090% | 0.0002% | 0.0457 | NA |
| Bacteria | Proteobacteria  | Betaproteobacteria  | Burkholderiales     | Sutterellaceae       | Sutterella             | 0.1147% | 0.0002% | 0.0457 | NA |
| Bacteria | Firmicutes      | Clostridia          | Clostridiales       | Lachnospiraceae      | Anaerotaenia           | 0.0197% | 0.0000% | 0.0508 | NA |
| Bacteria | Firmicutes      | Clostridia          | Clostridiales       | Ruminococcaceae      | Gemmiger               | 0.0165% | 0.0000% | 0.0508 | NA |
| Bacteria | Firmicutes      | Negativicutes       | Selenomonadales     | Selenomonadaceae     | Megamonas              | 0.0134% | 0.0000% | 0.0508 | NA |
| Bacteria | Firmicutes      | Negativicutes       | Acidaminococcales   | Acidaminococcaceae   | Phascolarctobacterium  | 0.0122% | 0.0000% | 0.0508 | NA |
| Bacteria | Bacteroidetes   | Bacteroidia         | Bacteroidales       | Prevotellaceae       | Paraprevotella         | 0.0081% | 0.0000% | 0.0508 | NA |
| Bacteria | Proteobacteria  | Betaproteobacteria  | Burkholderiales     | Oxalobacteraceae     | Massilia               | 0.0056% | 0.0000% | 0.0508 | NA |
| Bacteria | Firmicutes      | Erysipelotrichia    | Erysipelotrichales  | Erysipelotrichaceae  | Holdemanella           | 0.0046% | 0.0000% | 0.0508 | NA |
| Bacteria | Firmicutes      | Clostridia          | Clostridiales       | Ruminococcaceae      | Sporobacter            | 0.0036% | 0.0000% | 0.0508 | NA |
| Bacteria | Firmicutes      | Clostridia          | Clostridiales       | Lachnospiraceae      | Coprococcus            | 0.0020% | 0.0000% | 0.0508 | NA |
| Bacteria | Firmicutes      | Erysipelotrichia    | Erysipelotrichales  | Erysipelotrichaceae  | Bulleidia              | 0.0025% | 0.0426% | 0.0527 | NA |
| Bacteria | Bacteroidetes   | Bacteroidia         | Bacteroidales       | Barnesiellaceae      | Barnesiella            | 0.0331% | 0.0006% | 0.0548 | NA |
| Bacteria | Spirochaetes    | Spirochaetia        | Spirochaetales      | Spirochaetaceae      | Sphaerochaeta          | 0.0265% | 0.0006% | 0.0548 | NA |
| Bacteria | Firmicutes      | Bacilli             | Lactobacillales     | Lactobacillaceae     | Lactobacillus          | 0.2343% | 0.8772% | 0.0583 | NA |
| Bacteria | Proteobacteria  | Gammaproteobacteria | Pseudomonadales     | Pseudomonadaceae     | Pseudomonas            | 0.0620% | 0.0261% | 0.0617 | NA |
| Bacteria | Proteobacteria  | Gammaproteobacteria | Pasteurellales      | Pasteurellaceae      | Mesocricetibacter      | 0.0000% | 0.0020% | 0.0668 | NA |
| Bacteria | Bacteroidetes   | Flavobacteriia      | Flavobacteriales    | Flavobacteriaceae    | Cloacibacterium        | 0.1464% | 0.0669% | 0.0778 | NA |
| Bacteria | Bacteroidetes   | Bacteroidia         | Bacteroidales       | Prevotellaceae       | Prevotellamassilia     | 0.0960% | 0.0000% | 0.0962 | NA |
| Bacteria | Proteobacteria  | Deltaproteobacteria | Myxococcales        | Polyangiaceae        | Chondromyces           | 0.0124% | 0.0000% | 0.0962 | NA |
| Bacteria | Proteobacteria  | Betaproteobacteria  | Rhodocyclales       | Rhodocyclaceae       | Propionivibrio         | 0.0117% | 0.0000% | 0.0962 | NA |
| Bacteria | Bacteroidetes   | Bacteroidia         | Bacteroidales       | Odoribacteraceae     | Butyricimonas          | 0.0079% | 0.0000% | 0.0962 | NA |
| Bacteria | Firmicutes      | Clostridia          | Clostridiales       | Lachnospiraceae      | Anaerostipes           | 0.0071% | 0.0000% | 0.0962 | NA |
| Bacteria | Firmicutes      | Tissierellia        | Tissierellales      |                      | Sporanaerobacter       | 0.0042% | 0.0000% | 0.0962 | NA |
| Bacteria | Firmicutes      | Clostridia          | Clostridiales       | Lachnospiraceae      | Eisenbergiella         | 0.0030% | 0.0000% | 0.0962 | NA |
| Bacteria | Firmicutes      | Clostridia          | Clostridiales       | Lachnospiraceae      | Fusicatenibacter       | 0.0019% | 0.0000% | 0.0962 | NA |
| Bacteria | Firmicutes      | Clostridia          | Clostridiales       |                      | Flintibacter           | 0.0250% | 0.0017% | 0.0979 | NA |
| Bacteria | Firmicutes      | Clostridia          | Clostridiales       | Eubacteriaceae       | Eubacterium            | 0.0130% | 0.0008% | 0.0979 | NA |
| Bacteria | Proteobacteria  | Alphaproteobacteria | Caulobacterales     | Caulobacteraceae     | Brevundimonas          | 0.0117% | 0.0006% | 0.0979 | NA |
| Bacteria | Firmicutes      | Bacilli             | Lactobacillales     | Streptococcaceae     | Lactococcus            | 0.0047% | 0.0185% | 0.1    | NA |
| Bacteria | Actinobacteria  | Actinobacteria      | Propionibacteriales | Propionibacteriaceae | Cutibacterium          | 0.0280% | 0.0143% | 0.1032 | NA |
| Bacteria | Proteobacteria  | Gammaproteobacteria | Pseudomonadales     | Moraxellaceae        | Moraxella              | 0.0293% | 0.0060% | 0.1084 | NA |
| Bacteria | Firmicutes      | Bacilli             | Lactobacillales     | Aerococcaceae        | Abiotrophia            | 0.2484% | 0.0121% | 0.1179 | NA |
| Bacteria | Actinobacteria  | Actinobacteria      | Micrococcales       | Dermacoccaceae       | Calidifontibacter      | 0.0000% | 0.0023% | 0.1423 | NA |
| Bacteria | Actinobacteria  | Coriobacteriia      | Eggerthellales      | Eggerthellaceae      | Cryptobacterium        | 0.0000% | 0.0004% | 0.1423 | NA |
| Bacteria | Proteobacteria  | Gammaproteobacteria | Enterobacteriales   | Enterobacteriaceae   | Citrobacter            | 0.0874% | 0.0376% | 0.1486 | NA |
| Bacteria | Bacteroidetes   | Flavobacteriia      | Flavobacteriales    | Flavobacteriaceae    | Chryseobacterium       | 0.0765% | 0.0430% | 0.1523 | NA |
| Bacteria | Bacteroidetes   | Bacteroidia         | Bacteroidales       | Muribaculaceae       | Muribaculum            | 0.0255% | 0.0545% | 0.1528 | NA |
| Bacteria | Bacteroidetes   | Bacteroidia         | Bacteroidales       | Odoribacteraceae     | Odoribacter            | 0.0984% | 0.0160% | 0.1571 | NA |
| Bacteria | Proteobacteria  | Gammaproteobacteria | Cardiobacteriales   | Cardiobacteriaceae   | Suttonella             | 0.0137% | 0.0002% | 0.1721 | NA |
| Bacteria | Verrucomicrobia | Verrucomicrobiae    | Verrucomicrobiales  | Akkermansiaceae      | Akkermansia            | 0.0092% | 0.0002% | 0.1721 | NA |
| Bacteria | Firmicutes      | Clostridia          | Clostridiales       | Eubacteriaceae       | Pseudoramibacter       | 0.0051% | 0.0001% | 0.1721 | NA |
| Bacteria | Actinobacteria  | Actinobacteria      | Bifidobacteriales   | Bifidobacteriaceae   | Bifidobacterium        | 0.0356% | 0.1707% | 0.1816 | NA |
| Bacteria | Proteobacteria  | Betaproteobacteria  | Burkholderiales     | Comamonadaceae       | Limnohabitans          | 0.0559% | 0.0000% | 0.1833 | NA |
| Bacteria | Actinobacteria  | Actinobacteria      | Micrococcales       | Microbacteriaceae    | Candidatus_Planktoluna | 0.0527% | 0.0000% | 0.1833 | NA |
| Bacteria | Firmicutes      | Clostridia          | Clostridiales       | Clostridiaceae       | Clostridium            | 0.0257% | 0.0000% | 0.1833 | NA |
| Bacteria | Proteobacteria  | Gammaproteobacteria | Cellvibrionales     | Cellvibrionaceae     | Cellvibrio             | 0.0217% | 0.0000% | 0.1833 | NA |
| Bacteria | Actinobacteria  | Coriobacteriia      | Coriobacteriales    | Coriobacteriaceae    | Collinsella            | 0.0112% | 0.0000% | 0.1833 | NA |

|          |                |                     |                     |                                          |                         |         |         |        |    |
|----------|----------------|---------------------|---------------------|------------------------------------------|-------------------------|---------|---------|--------|----|
| Bacteria | Firmicutes     | Bacilli             | Lactobacillales     | Lactobacillaceae                         | Pediococcus             | 0.0112% | 0.0000% | 0.1833 | NA |
| Bacteria | Firmicutes     | Clostridia          | Clostridiales       | Lachnospiraceae                          | Roseburia               | 0.0065% | 0.0000% | 0.1833 | NA |
| Bacteria | Firmicutes     | Clostridia          | Clostridiales       | Lachnospiraceae                          | Dorea                   | 0.0038% | 0.0000% | 0.1833 | NA |
| Bacteria | Firmicutes     | Tissierellia        | Tissierellales      | Peptoniphilaceae                         | Anaerococcus            | 0.0038% | 0.0000% | 0.1833 | NA |
| Bacteria | Proteobacteria | Gammaproteobacteria | Xanthomonadales     | Xanthomonadaceae                         | Stenotrophomonas        | 0.0028% | 0.0000% | 0.1833 | NA |
| Bacteria | Proteobacteria | Alphaproteobacteria | Rhodospirillales    | Acetobacteraceae                         | Acetobacter             | 0.0026% | 0.0000% | 0.1833 | NA |
| Bacteria | Actinobacteria | Actinobacteria      | Micrococcales       | Micrococcaceae                           | Glutamicibacter         | 0.0022% | 0.0000% | 0.1833 | NA |
| Bacteria | Firmicutes     | Clostridia          | Clostridiales       | Clostridiaceae                           | Butyricoccus            | 0.0020% | 0.0000% | 0.1833 | NA |
| Bacteria | Proteobacteria | Gammaproteobacteria | Alteromonadales     | Shewanellaceae                           | Shewanella              | 0.0020% | 0.0000% | 0.1833 | NA |
| Bacteria | Firmicutes     | Clostridia          | Clostridiales       | Clostridiaceae                           | Hungatella              | 0.0015% | 0.0000% | 0.1833 | NA |
| Bacteria | Proteobacteria | Betaproteobacteria  | Burkholderiales     | Comamonadaceae                           | Kinneretia              | 0.0012% | 0.0000% | 0.1833 | NA |
| Bacteria | Firmicutes     | Clostridia          | Clostridiales       | Lachnospiraceae                          | Anaerotignum            | 0.0009% | 0.0000% | 0.1833 | NA |
| Bacteria | Proteobacteria | Gammaproteobacteria | Enterobacteriales   | Morganellaceae                           | Providencia             | 0.0007% | 0.0000% | 0.1833 | NA |
| Bacteria | Firmicutes     | Clostridia          | Clostridiales       | Clostridiales_Family_XIII_Incertae_Sedis | Ihubacter               | 0.0358% | 0.0029% | 0.2001 | NA |
| Bacteria | Fusobacteria   | Fusobacteriia       | Fusobacteriales     | Leptotrichiaceae                         | Sneathia                | 0.1468% | 0.0763% | 0.2182 | NA |
| Bacteria | Firmicutes     | Bacilli             | Lactobacillales     | Enterococcaceae                          | Enterococcus            | 0.0003% | 0.0014% | 0.2354 | NA |
| Bacteria | Firmicutes     | Clostridia          | Clostridiales       | Defluviitaleaceae                        | Defluviitalea           | 0.1262% | 0.0708% | 0.2409 | NA |
| Bacteria | Proteobacteria | Deltaproteobacteria | Desulfobacterales   | Desulfobulbaceae                         | Desulfobulbus           | 0.1157% | 0.0103% | 0.251  | NA |
| Bacteria | Actinobacteria | Actinobacteria      | Bifidobacteriales   | Bifidobacteriaceae                       | Scardovia               | 0.0007% | 0.0733% | 0.2703 | NA |
| Bacteria | Bacteroidetes  | Bacteroidia         | Bacteroidales       | Paludibacteraceae                        | Paludibacter            | 0.1433% | 0.1264% | 0.2812 | NA |
| Bacteria | Firmicutes     | Erysipelotrichia    | Erysipelotrichales  | Erysipelotrichaceae                      | Solobacterium           | 0.0185% | 0.0170% | 0.2835 | NA |
| Bacteria | Firmicutes     | Tissierellia        | Tissierellales      | Peptoniphilaceae                         | Peptoniphilus           | 0.0030% | 0.0046% | 0.2991 | NA |
| Bacteria | Firmicutes     | Clostridia          | Clostridiales       | Lachnospiraceae                          | Shuttleworthia          | 0.0099% | 0.0082% | 0.305  | NA |
| Bacteria | Actinobacteria | Actinobacteria      | Corynebacteriales   | Dietziaceae                              | Dietzia                 | 0.0000% | 0.0005% | 0.3168 | NA |
| Bacteria | Actinobacteria | Actinobacteria      | Micrococcales       | Micrococcaceae                           | Nesterenkononia         | 0.0000% | 0.0011% | 0.3168 | NA |
| Bacteria | Actinobacteria | Actinobacteria      | Propionibacteriales | Nocardiodaceae                           | Aeromicrobium           | 0.0000% | 0.0007% | 0.3168 | NA |
| Bacteria | Actinobacteria | Actinobacteria      | Propionibacteriales | Nocardiodaceae                           | Micropruina             | 0.0000% | 0.0006% | 0.3168 | NA |
| Bacteria | Bacteroidetes  | Flavobacteriia      | Flavobacteriales    | Flavobacteriaceae                        | Myroides                | 0.0000% | 0.0003% | 0.3168 | NA |
| Bacteria | Cyanobacteria  |                     | Synechococcales     | Chamaesiphonaceae                        | Chamaesiphon            | 0.0000% | 0.0005% | 0.3168 | NA |
| Bacteria | Firmicutes     | Bacilli             | Bacillales          | Bacillaceae                              | Virgibacillus           | 0.0000% | 0.0002% | 0.3168 | NA |
| Bacteria | Firmicutes     | Clostridia          | Clostridiales       | Gracilibacteraceae                       | Gracilibacter           | 0.0000% | 0.0002% | 0.3168 | NA |
| Bacteria | Firmicutes     | Clostridia          | Clostridiales       | Lachnospiraceae                          | Abyssivirga             | 0.0000% | 0.0008% | 0.3168 | NA |
| Bacteria | Firmicutes     | Erysipelotrichia    | Erysipelotrichales  | Erysipelotrichaceae                      | Faecalibaculum          | 0.0000% | 0.0025% | 0.3168 | NA |
| Bacteria | Proteobacteria | Alphaproteobacteria | Rhizobiales         | Hyphomicrobiaceae                        | Pelagibacterium         | 0.0000% | 0.0007% | 0.3168 | NA |
| Bacteria | Proteobacteria | Alphaproteobacteria | Rhizobiales         | Xanthobacteraceae                        | Azorhizobium            | 0.0000% | 0.0069% | 0.3168 | NA |
| Bacteria | Proteobacteria | Alphaproteobacteria | Rhodospirillales    | Acetobacteraceae                         | Roseomonas              | 0.0000% | 0.0013% | 0.3168 | NA |
| Bacteria | Proteobacteria | Betaproteobacteria  | Burkholderiales     | Burkholderiaceae                         | Cupriavidus             | 0.0000% | 0.0042% | 0.3168 | NA |
| Bacteria | Proteobacteria | Gammaproteobacteria | Pasteurellales      | Pasteurellaceae                          | Actinobacillus          | 0.0000% | 0.0011% | 0.3168 | NA |
| Bacteria | Proteobacteria | Gammaproteobacteria | Xanthomonadales     | Xanthomonadaceae                         | Luteimonas              | 0.0000% | 0.0005% | 0.3168 | NA |
| Bacteria | Proteobacteria | Gammaproteobacteria | Xanthomonadales     | Xanthomonadaceae                         | Pseudoxanthomonas       | 0.0000% | 0.0085% | 0.3168 | NA |
| Bacteria | Proteobacteria | Betaproteobacteria  | Neisseriales        | Neisseriaceae                            | Kingella                | 0.1824% | 0.2455% | 0.3244 | NA |
| Bacteria | Firmicutes     | Clostridia          | Clostridiales       | Peptostreptococcaceae                    | Peptostreptococcus      | 0.2068% | 0.0800% | 0.325  | NA |
| Bacteria | Proteobacteria | Betaproteobacteria  | Neisseriales        | Neisseriaceae                            | Eikenella               | 0.1104% | 0.1075% | 0.3316 | NA |
| Bacteria | Firmicutes     | Clostridia          | Clostridiales       | Lachnospiraceae                          | Lachnoanaerobaculum     | 0.2618% | 0.3593% | 0.3322 | NA |
| Bacteria | Proteobacteria | Deltaproteobacteria | Desulfovibrionales  | Desulfomicrobiaceae                      | Desulfomicrobium        | 0.0071% | 0.0024% | 0.3346 | NA |
| Bacteria | Actinobacteria | Actinobacteria      | Propionibacteriales | Propionibacteriaceae                     | Pseudopropionibacterium | 0.0033% | 0.0103% | 0.3434 | NA |
| Bacteria | Tenericutes    | Mollicutes          | Acholeplasmatales   | Acholeplasmataceae                       | Acholeplasma            | 0.0082% | 0.0009% | 0.3475 | NA |
| Bacteria | Proteobacteria | Betaproteobacteria  | Neisseriales        | Neisseriaceae                            | Snodgrassella           | 0.0153% | 0.0360% | 0.3582 | NA |
| Bacteria | Firmicutes     | Erysipelotrichia    | Erysipelotrichales  | Erysipelotrichaceae                      | Turcibacter             | 0.1406% | 0.0000% | 0.365  | NA |



|          |                |                       |                    |                        |                     |         |         |       |    |
|----------|----------------|-----------------------|--------------------|------------------------|---------------------|---------|---------|-------|----|
| Bacteria | Proteobacteria | Gammaproteobacteria   | Aeromonadales      | Aeromonadaceae         | Aeromonas           | 0.0180% | 0.0000% | 0.365 | NA |
| Bacteria | Proteobacteria | Alphaproteobacteria   | Rhodospirillales   | Rhodospirillaceae      | Dongia              | 0.0177% | 0.0000% | 0.365 | NA |
| Bacteria | Cyanobacteria  |                       | Nostocales         | Rivulariaceae          | Calothrix           | 0.0175% | 0.0000% | 0.365 | NA |
| Bacteria | Bacteroidetes  | Cytophagia            | Cytophagales       | Cytophagaceae          | Emticicia           | 0.0162% | 0.0000% | 0.365 | NA |
| Bacteria | Proteobacteria | Alphaproteobacteria   | Rhizobiales        | Hyphomicrobiaceae      | Devosia             | 0.0144% | 0.0000% | 0.365 | NA |
| Bacteria | Bacteroidetes  | Flavobacteriia        | Flavobacteriales   | Crocinitomicaceae      | Fluviicola          | 0.0131% | 0.0000% | 0.365 | NA |
| Bacteria | Proteobacteria | Betaproteobacteria    | Burkholderiales    | Oxalobacteraceae       | Undibacterium       | 0.0128% | 0.0000% | 0.365 | NA |
| Bacteria | Proteobacteria | Betaproteobacteria    | Burkholderiales    | Burkholderiaceae       | Polynucleobacter    | 0.0127% | 0.0000% | 0.365 | NA |
| Bacteria | Proteobacteria | Betaproteobacteria    | Burkholderiales    | Comamonadaceae         | Simplicispira       | 0.0097% | 0.0000% | 0.365 | NA |
| Bacteria | Proteobacteria | Betaproteobacteria    | Burkholderiales    | Burkholderiaceae       | Hydromonas          | 0.0095% | 0.0000% | 0.365 | NA |
| Bacteria | Proteobacteria | Betaproteobacteria    | Burkholderiales    | Burkholderiaceae       | Limnobacter         | 0.0090% | 0.0000% | 0.365 | NA |
| Bacteria | Proteobacteria | Betaproteobacteria    | Rhodocyclales      | Azonexaceae            | Dechloromonas       | 0.0090% | 0.0000% | 0.365 | NA |
| Bacteria | Proteobacteria | Epsilonproteobacteria | Campylobacteriales | Helicobacteraceae      | Wolinella           | 0.0061% | 0.0000% | 0.365 | NA |
| Bacteria | Actinobacteria | Actinobacteria        | Corynebacteriales  | Mycobacteriaceae       | Mycolicibacterium   | 0.0047% | 0.0000% | 0.365 | NA |
| Bacteria | Proteobacteria | Betaproteobacteria    | Rhodocyclales      | Azonexaceae            | Quatronicoccus      | 0.0047% | 0.0000% | 0.365 | NA |
| Bacteria | Acidobacteria  | Solibacteres          | Solibacterales     | Bryobacteraceae        | Paludibaculum       | 0.0042% | 0.0000% | 0.365 | NA |
| Bacteria | Actinobacteria | Actinobacteria        | Micrococcales      | Microbacteriaceae      | Rhodoluna           | 0.0040% | 0.0000% | 0.365 | NA |
| Bacteria | Proteobacteria | Oligoflexia           | Bdellovibrionales  | Bdellovibrionaceae     | Bdellovibrio        | 0.0038% | 0.0000% | 0.365 | NA |
| Bacteria | Proteobacteria | Gammaproteobacteria   | Thiotrichales      | Piscirickettsiaceae    | Methylophaga        | 0.0036% | 0.0000% | 0.365 | NA |
| Bacteria | Bacteroidetes  | Flavobacteriia        | Flavobacteriales   | Flavobacteriaceae      | Mesoflavibacter     | 0.0035% | 0.0000% | 0.365 | NA |
| Bacteria | Bacteroidetes  | Flavobacteriia        | Flavobacteriales   | Flavobacteriaceae      | Polaribacter        | 0.0035% | 0.0000% | 0.365 | NA |
| Bacteria | Proteobacteria | Epsilonproteobacteria | Campylobacteriales | Campylobacteraceae     | Arcobacter          | 0.0035% | 0.0000% | 0.365 | NA |
| Bacteria | Firmicutes     | Clostridia            | Clostridiales      | Lachnospiraceae        | Tyzzera             | 0.0034% | 0.0000% | 0.365 | NA |
| Bacteria | Bacteroidetes  | Bacteroidia           | Bacteroidales      | Bacteroidaceae         | Mediterranea        | 0.0033% | 0.0000% | 0.365 | NA |
| Bacteria | Proteobacteria | Gammaproteobacteria   | Enterobacteriales  | Morganellaceae         | Morganella          | 0.0030% | 0.0000% | 0.365 | NA |
| Bacteria | Firmicutes     | Clostridia            | Clostridiales      |                        | Fenollaria          | 0.0030% | 0.0000% | 0.365 | NA |
| Bacteria | Firmicutes     | Clostridia            | Clostridiales      | Hungateiclostridiaceae | Hungateiclostridium | 0.0030% | 0.0000% | 0.365 | NA |
| Bacteria | Firmicutes     | Clostridia            | Clostridiales      | Lachnospiraceae        | Lachnospira         | 0.0029% | 0.0000% | 0.365 | NA |
| Bacteria | Proteobacteria | Alphaproteobacteria   | Rhizobiales        | Methylobacteriaceae    | Methylorubrum       | 0.0029% | 0.0000% | 0.365 | NA |
| Bacteria | Proteobacteria | Betaproteobacteria    | Burkholderiales    | Alcaligenaceae         | Alcaligenes         | 0.0027% | 0.0000% | 0.365 | NA |
| Bacteria | Bacteroidetes  | Bacteroidia           | Bacteroidales      | Barnesiellaceae        | Coprobacter         | 0.0023% | 0.0000% | 0.365 | NA |
| Bacteria | Chloroflexi    | Caldilineae           | Caldilineales      | Caldilineaceae         | Litorilinea         | 0.0022% | 0.0000% | 0.365 | NA |
| Bacteria | Proteobacteria | Betaproteobacteria    | Burkholderiales    | Sutterellaceae         | Duodenibacillus     | 0.0021% | 0.0000% | 0.365 | NA |
| Bacteria | Bacteroidetes  | Saprospira            | Saprospirales      | Haliscomenobacteraceae | Phaeodactylibacter  | 0.0018% | 0.0000% | 0.365 | NA |
| Bacteria | Proteobacteria | Gammaproteobacteria   | Enterobacteriales  | Morganellaceae         | Proteus             | 0.0017% | 0.0000% | 0.365 | NA |
| Bacteria | Actinobacteria | Actinobacteria        | Micrococcales      | Dermabacteraceae       | Brachybacterium     | 0.0016% | 0.0000% | 0.365 | NA |
| Bacteria | Proteobacteria | Betaproteobacteria    | Burkholderiales    | Comamonadaceae         | Rhodoferax          | 0.0016% | 0.0000% | 0.365 | NA |
| Bacteria | Proteobacteria | Alphaproteobacteria   | Sphingomonadales   | Sphingomonadaceae      | Sphingorhabdus      | 0.0014% | 0.0000% | 0.365 | NA |
| Bacteria | Firmicutes     | Clostridia            | Clostridiales      | Ruminococcaceae        | Ethanoligenens      | 0.0013% | 0.0000% | 0.365 | NA |
| Bacteria | Proteobacteria | Alphaproteobacteria   | Rhodospirillales   | Rhodospirillaceae      | Aliidongia          | 0.0013% | 0.0000% | 0.365 | NA |
| Bacteria | Firmicutes     | Bacilli               | Bacillales         | Bacillaceae            | Polygonibacillus    | 0.0013% | 0.0000% | 0.365 | NA |
| Bacteria | Proteobacteria | Alphaproteobacteria   | Sphingomonadales   | Sphingomonadaceae      | Sphingobium         | 0.0012% | 0.0000% | 0.365 | NA |
| Bacteria | Bacteroidetes  | Chitinophagia         | Chitinophagales    | Chitinophagaceae       | Nemorincola         | 0.0012% | 0.0000% | 0.365 | NA |
| Bacteria | Firmicutes     | Clostridia            | Clostridiales      | Lachnospiraceae        | Herbinix            | 0.0011% | 0.0000% | 0.365 | NA |
| Bacteria | Proteobacteria | Gammaproteobacteria   | Alteromonadales    | Colwelliaceae          | Colwellia           | 0.0011% | 0.0000% | 0.365 | NA |
| Bacteria | Firmicutes     | Clostridia            | Clostridiales      |                        | Intestinimonas      | 0.0010% | 0.0000% | 0.365 | NA |
| Bacteria | Proteobacteria | Betaproteobacteria    | Burkholderiales    | Comamonadaceae         | Xenophilus          | 0.0009% | 0.0000% | 0.365 | NA |
| Bacteria | Proteobacteria | Alphaproteobacteria   | Sphingomonadales   | Sphingomonadaceae      | Sphingopyxis        | 0.0009% | 0.0000% | 0.365 | NA |
| Bacteria | Firmicutes     | Clostridia            | Clostridiales      | Defluviitaleaceae      | Vallitalea          | 0.0008% | 0.0000% | 0.365 | NA |

|          |                            |                     |                         |                                          |                        |         |         |        |    |
|----------|----------------------------|---------------------|-------------------------|------------------------------------------|------------------------|---------|---------|--------|----|
| Bacteria | Firmicutes                 | Clostridia          | Halanaerobiales         | Halanaerobiaceae                         | Halocella              | 0.0008% | 0.0000% | 0.365  | NA |
| Bacteria | Chlamydiae                 | Chlamydiai          | Parachlamydiales        | Criblamydiaceae                          | Estrella               | 0.0008% | 0.0000% | 0.365  | NA |
| Bacteria | Firmicutes                 | Bacilli             | Bacillales              | Alicyclobacillaceae                      | Alicyclobacillus       | 0.0008% | 0.0000% | 0.365  | NA |
| Bacteria | Firmicutes                 | Bacilli             | Bacillales              | Paenibacillaceae                         | Thermobacillus         | 0.0008% | 0.0000% | 0.365  | NA |
| Bacteria | Firmicutes                 | Bacilli             | Bacillales              | Planococcaceae                           | Sporosarcina           | 0.0008% | 0.0000% | 0.365  | NA |
| Bacteria | Firmicutes                 | Bacilli             | Bacillales              | Paenibacillaceae                         | Cohnella               | 0.0007% | 0.0000% | 0.365  | NA |
| Bacteria | Proteobacteria             | Alphaproteobacteria | Rhodobacterales         | Rhodobacteraceae                         | Rubellimicrobium       | 0.0006% | 0.0000% | 0.365  | NA |
| Bacteria | Proteobacteria             | Alphaproteobacteria | Rhodobacterales         | Rhodobacteraceae                         | Rhodobacter            | 0.0006% | 0.0000% | 0.365  | NA |
| Bacteria | Proteobacteria             | Alphaproteobacteria | Rhizobiales             | Rhizobiaceae                             | Shinella               | 0.0006% | 0.0000% | 0.365  | NA |
| Bacteria | Candidatus_Melainabacteria |                     | Vampirovibrionales      |                                          | Vampirovibrio          | 0.0006% | 0.0000% | 0.365  | NA |
| Bacteria | Proteobacteria             | Betaproteobacteria  | Neisseriales            | Neisseriaceae                            | Conchiformibius        | 0.0005% | 0.0000% | 0.365  | NA |
| Bacteria | Firmicutes                 | Erysipelotrichia    | Erysipelotrichales      | Erysipelotrichaceae                      | Catenibacterium        | 0.0005% | 0.0000% | 0.365  | NA |
| Bacteria | Bacteroidetes              | Bacteroidia         | Bacteroidales           | Dysgonamonadaceae                        | Proteiniphilum         | 0.0004% | 0.0000% | 0.365  | NA |
| Bacteria | Armatimonadetes            | Fimbriimonadia      | Fimbriimonadales        | Fimbriimonadaceae                        | Fimbriimonas           | 0.0004% | 0.0000% | 0.365  | NA |
| Archaea  | Euryarchaeota              | Thermoplasmata      | Methanomassiliicoccales | Methanomassiliicoccaceae                 | Methanomassiliicoccus  | 0.0004% | 0.0000% | 0.365  | NA |
| Bacteria | Proteobacteria             | Gammaproteobacteria | Pasteurellales          | Pasteurellaceae                          | Frederiksenia          | 0.0004% | 0.0000% | 0.365  | NA |
| Bacteria | Actinobacteria             | Actinobacteria      | Geodermatophilales      | Geodermatophilaceae                      | Blastococcus           | 0.0004% | 0.0000% | 0.365  | NA |
| Bacteria | Firmicutes                 | Erysipelotrichia    | Erysipelotrichales      | Erysipelotrichaceae                      | Eggerthia              | 0.0004% | 0.0000% | 0.365  | NA |
| Bacteria | Proteobacteria             | Gammaproteobacteria | Aeromonadales           | Succinivibrionaceae                      | Succinivibrio          | 0.0003% | 0.0000% | 0.365  | NA |
| Bacteria | Actinobacteria             | Actinobacteria      | Frankiales              | Motilibacteraceae                        | Motilibacter           | 0.0002% | 0.0000% | 0.365  | NA |
| Bacteria | Proteobacteria             | Deltaproteobacteria | Desulfuromonadales      | Geobacteraceae                           | Geothermobacter        | 0.0002% | 0.0000% | 0.365  | NA |
| Bacteria | Firmicutes                 | Clostridia          | Clostridiales           | Ruminococcaceae                          | Neglecta               | 0.0002% | 0.0000% | 0.365  | NA |
| Bacteria | Firmicutes                 | Bacilli             | Bacillales              | Bacillaceae                              | Pseudogracilibacillus  | 0.0002% | 0.0000% | 0.365  | NA |
| Bacteria | Firmicutes                 | Clostridia          | Clostridiales           | Lachnospiraceae                          | Faecalicatena          | 0.0001% | 0.0000% | 0.365  | NA |
| Bacteria | Firmicutes                 | Clostridia          | Clostridiales           | Lachnospiraceae                          | Pseudobutyrvibrio      | 0.0001% | 0.0000% | 0.365  | NA |
| Bacteria | Firmicutes                 | Clostridia          | Clostridiales           | Ruminococcaceae                          | Flavonifractor         | 0.0001% | 0.0000% | 0.365  | NA |
| Bacteria | Actinobacteria             | Coriobacteriia      | Eggerthellales          | Eggerthellaceae                          | Eggerthella            | 0.0001% | 0.0000% | 0.365  | NA |
| Bacteria | Proteobacteria             | Deltaproteobacteria | Desulfovibrionales      | Desulfovibrionaceae                      | Desulfovibrio          | 0.0109% | 0.0186% | 0.3709 | NA |
| Bacteria | Firmicutes                 | Clostridia          | Clostridiales           | Peptostreptococcaceae                    | Peptoanaerobacter      | 0.0455% | 0.0314% | 0.3719 | NA |
| Bacteria | Actinobacteria             | Actinobacteria      | Actinomycetales         | Actinomycetaceae                         | Mobiluncus             | 0.0009% | 0.0004% | 0.3735 | NA |
| Bacteria | Firmicutes                 | Tissierellia        | Tissierellales          | Peptoniphilaceae                         | Parvimonas             | 0.1261% | 0.1455% | 0.3985 | NA |
| Bacteria | Bacteroidetes              | Flavobacteriia      | Flavobacteriales        | Flavobacteriaceae                        | Bergeyella             | 0.0014% | 0.0010% | 0.4006 | NA |
| Bacteria | Firmicutes                 | Clostridia          | Clostridiales           | Clostridiales_Family_XIII_Incertae_Sedis |                        | 0.1874% | 0.1232% | 0.4127 | NA |
| Bacteria | Firmicutes                 | Bacilli             | Lactobacillales         | Leuconostocaceae                         | Leuconostoc            | 0.0107% | 0.0004% | 0.4197 | NA |
| Bacteria | Firmicutes                 | Clostridia          | Clostridiales           | Peptococcaceae                           | Peptococcus            | 0.0058% | 0.0007% | 0.4624 | NA |
| Bacteria | Proteobacteria             | Alphaproteobacteria | Rhodobacterales         | Rhodobacteraceae                         | Paracoccus             | 0.0327% | 0.0020% | 0.4685 | NA |
| Bacteria | Firmicutes                 | Clostridia          | Clostridiales           | Clostridiales_Family_XIII_Incertae_Sedis | Mogibacterium          | 0.0018% | 0.0070% | 0.47   | NA |
| Bacteria | Proteobacteria             | Alphaproteobacteria | Sphingomonadales        | Sphingomonadaceae                        | Sphingomonas           | 0.0004% | 0.0095% | 0.4808 | NA |
| Bacteria | Actinobacteria             | Actinobacteria      | Corynebacteriales       | Gordoniaceae                             | Gordonia               | 0.0004% | 0.0016% | 0.4808 | NA |
| Bacteria | Proteobacteria             | Gammaproteobacteria | Xanthomonadales         | Xanthomonadaceae                         | Xanthomonas            | 0.0001% | 0.0044% | 0.4808 | NA |
| Bacteria | Bacteroidetes              | Bacteroidia         | Bacteroidales           |                                          | Phocaecicola           | 0.0364% | 0.0108% | 0.5276 | NA |
| Bacteria | Firmicutes                 | Tissierellia        | Tissierellales          | Tissierellaceae                          |                        | 0.0222% | 0.0053% | 0.5328 | NA |
| Bacteria | Actinobacteria             | Actinobacteria      | Corynebacteriales       |                                          | Lawsonella             | 0.0209% | 0.0060% | 0.5328 | NA |
| Bacteria | Synergistetes              | Synergistia         | Synergistales           | Synergistaceae                           | Pyramidobacter         | 0.0071% | 0.0029% | 0.5537 | NA |
| Bacteria | Firmicutes                 | Clostridia          | Clostridiales           | Hungateiclostridiaceae                   | Anaerobacterium        | 0.0718% | 0.0607% | 0.5775 | NA |
| Bacteria | Firmicutes                 | Bacilli             | Bacillales              |                                          | Exiguobacterium        | 0.0279% | 0.0009% | 0.5921 | NA |
| Bacteria | Actinobacteria             | Actinobacteria      | Micrococcales           | Micrococcaceae                           | Micrococcus            | 0.0063% | 0.0005% | 0.5921 | NA |
| Bacteria | Actinobacteria             | Coriobacteriia      | Eggerthellales          | Eggerthellaceae                          | Slackia                | 0.0026% | 0.0003% | 0.5921 | NA |
| Bacteria | Firmicutes                 | Erysipelotrichia    | Erysipelotrichales      | Erysipelotrichaceae                      | Erysipelatoclostridium | 0.0015% | 0.0002% | 0.5921 | NA |

|          |                |                     |                   |                                          |                     |         |         |        |    |
|----------|----------------|---------------------|-------------------|------------------------------------------|---------------------|---------|---------|--------|----|
| Bacteria | Firmicutes     | Clostridia          | Clostridiales     | Lachnospiraceae                          | Catonella           | 0.2131% | 0.0863% | 0.5926 | NA |
| Bacteria | Actinobacteria | Actinobacteria      | Corynebacteriales | Nocardiaceae                             | Rhodococcus         | 0.0044% | 0.0044% | 0.6005 | NA |
| Bacteria | Bacteroidetes  | Bacteroidia         | Bacteroidales     | Bacteroidaceae                           | Anaerorhabdus       | 0.0009% | 0.0021% | 0.6005 | NA |
| Bacteria | Actinobacteria | Coriobacteriia      | Coriobacteriales  | Atopobiaceae                             | Atopobium           | 0.1034% | 0.2159% | 0.6168 | NA |
| Bacteria | Chloroflexi    | Anaerolineae        | Anaerolineales    | Anaerolineaceae                          | Flexilinea          | 0.0012% | 0.0006% | 0.6317 | NA |
| Bacteria | Proteobacteria | Betaproteobacteria  | Burkholderiales   | Comamonadaceae                           | Brachymonas         | 0.0726% | 0.0330% | 0.6436 | NA |
| Bacteria | Firmicutes     | Clostridia          | Clostridiales     | Hungateiclostridiaceae                   | Ruminiclostridium   | 0.0645% | 0.0794% | 0.6556 | NA |
| Bacteria | Firmicutes     | Clostridia          | Clostridiales     | Clostridiales_Family_XIII_Incertae_Sedis | Emergencia          | 0.0012% | 0.0016% | 0.6723 | NA |
| Bacteria | Firmicutes     | Negativicutes       | Veillonellales    | Veillonellaceae                          | Anaeroglobus        | 0.0299% | 0.0922% | 0.6811 | NA |
| Bacteria | Firmicutes     | Clostridia          | Clostridiales     | Clostridiaceae                           | Keratinibaculum     | 0.0383% | 0.0010% | 0.7035 | NA |
| Bacteria | Firmicutes     | Clostridia          | Clostridiales     | Ruminococcaceae                          |                     | 0.0038% | 0.0010% | 0.7035 | NA |
| Bacteria | Firmicutes     | Clostridia          | Clostridiales     | Clostridiales_Family_XIII_Incertae_Sedis | Aminipila           | 0.0405% | 0.0323% | 0.7062 | NA |
| Bacteria | Actinobacteria | Actinobacteria      | Corynebacteriales | Corynebacteriaceae                       | Corynebacterium     | 0.1962% | 0.9926% | 0.7149 | NA |
| Bacteria | Firmicutes     | Clostridia          | Clostridiales     | Christensenellaceae                      | Christensenella     | 0.0425% | 0.0212% | 0.7237 | NA |
| Bacteria | Cyanobacteria  |                     | Oscillatoriales   | Oscillatoriaceae                         | Aerosakkonema       | 0.1981% | 0.3371% | 0.743  | NA |
| Bacteria | Firmicutes     | Bacilli             | Bacillales        | Bacillaceae                              | Bacillus            | 0.0887% | 0.0703% | 0.7577 | NA |
| Bacteria | Firmicutes     | Negativicutes       | Selenomonadales   | Selenomonadaceae                         | Schwartzia          | 0.0105% | 0.0027% | 0.771  | NA |
| Bacteria | Fusobacteria   | Fusobacteriia       | Fusobacteriales   | Leptotrichiaceae                         | Streptobacillus     | 0.0707% | 0.1706% | 0.8    | NA |
| Bacteria | Firmicutes     | Negativicutes       | Veillonellales    | Veillonellaceae                          | Dialister           | 0.1725% | 0.1370% | 0.8005 | NA |
| Bacteria | Firmicutes     | Bacilli             | Bacillales        | Staphylococcaceae                        | Staphylococcus      | 0.2000% | 0.0332% | 0.8467 | NA |
| Bacteria | Firmicutes     | Clostridia          | Clostridiales     | Lachnospiraceae                          | Moryella            | 0.0281% | 0.0189% | 0.8611 | NA |
| Bacteria | Firmicutes     | Bacilli             | Lactobacillales   | Leuconostocaceae                         | Weissella           | 0.0251% | 0.0021% | 0.8685 | NA |
| Bacteria | Actinobacteria | Coriobacteriia      | Coriobacteriales  | Atopobiaceae                             | Olsenella           | 0.0143% | 0.0077% | 0.8977 | NA |
| Bacteria | Proteobacteria | Alphaproteobacteria | Sphingomonadales  | Sphingomonadaceae                        | Novosphingobium     | 0.0155% | 0.0292% | 0.9456 | NA |
| Bacteria | Actinobacteria | Actinobacteria      | Bifidobacteriales | Bifidobacteriaceae                       | Parascardovia       | 0.0023% | 0.0111% | 0.9456 | NA |
| Bacteria | Cyanobacteria  |                     | Nostocales        | Tolypothrichaceae                        | Kryptousia          | 0.0001% | 0.0748% | 0.9456 | NA |
| Bacteria | Actinobacteria | Actinobacteria      | Actinomycetales   | Actinomycetaceae                         | Actinotignum        | 0.0084% | 0.2284% | 0.9521 | NA |
| Bacteria | Firmicutes     | Clostridia          | Clostridiales     | Lachnospiraceae                          | Stomatobaculum      | 0.1229% | 0.2220% | 0.9597 | NA |
| Bacteria | Firmicutes     | Clostridia          | Clostridiales     | Lachnospiraceae                          | Butyrivibrio        | 0.0157% | 0.0144% | 0.9632 | NA |
| Bacteria | Actinobacteria | Actinobacteria      | Actinomycetales   | Actinomycetaceae                         | Actinobaculum       | 0.0398% | 0.0500% | 0.9896 | NA |
| Bacteria | Firmicutes     | Negativicutes       | Veillonellales    | Veillonellaceae                          | Megasphaera         | 0.1544% | 0.1219% | 0.9897 | NA |
| Bacteria | Proteobacteria | Alphaproteobacteria | Sphingomonadales  | Sphingomonadaceae                        | Zymomonas           | 0.0207% | 0.0007% | 1      | NA |
| Bacteria | Firmicutes     | Clostridia          | Clostridiales     | Lachnospiraceae                          | Blautia             | 0.0078% | 0.0016% | 1      | NA |
| Bacteria | Elusimicrobia  | Endomicrobia        | Endomicrobiales   | Endomicrobiaceae                         | Endomicrobium       | 0.0022% | 0.0005% | 1      | NA |
| Bacteria | Firmicutes     | Clostridia          | Clostridiales     | Ruminococcaceae                          | Acetanaerobacterium | 0.0016% | 0.0001% | 1      | NA |
| Bacteria | Firmicutes     | Clostridia          | Clostridiales     | Ruminococcaceae                          | Acetivibrio         | 0.0011% | 0.0005% | 1      | NA |
| Bacteria | Proteobacteria | Alphaproteobacteria | Caulobacteriales  | Caulobacteraceae                         | Caulobacter         | 0.0009% | 0.0007% | 1      | NA |
| Bacteria | Actinobacteria | Actinobacteria      | Corynebacteriales | Nocardiaceae                             | Nocardia            | 0.0009% | 0.0007% | 1      | NA |
| Bacteria | Proteobacteria | Betaproteobacteria  | Burkholderiales   | Comamonadaceae                           | Comamonas           | 0.0002% | 0.0002% | 1      | NA |
